# Supplementary material for: Impacts of type 2 diabetes mellitus and hypertension on the incidence of cardiovascular diseases and stroke in China real-world setting: a retrospective cohort study
Source: PubMed Central journal article supplement (PMC8634005; doi:10.1136/bmjopen-2021-053698), 2021-11-29
Supplement: bmjopen-2021-053698.draft_revisions.pdf [file bmjopen-2021-053698.draft_revisions.pdf]

# BMJ Open

BMJ Open is committed to open peer review. As part of this commitment we make the peer review history of every article we publish publicly available.

When an article is published we post the peer reviewers' comments and the authors' responses online. We also post the versions of the paper that were used during peer review. These are the versions that the peer review comments apply to.

The versions of the paper that follow are the versions that were submitted during the peer review process. They are not the versions of record or the final published versions. They should not be cited or distributed as the published version of this manuscript.

BMJ Open is an open access journal and the full, final, typeset and author-corrected version of record of the manuscript is available on our site with no access controls, subscription charges or pay-per-view fees (<http://bmjopen.bmj.com>).

If you have any questions on BMJ Open's open peer review process please email [info.bmjopen@bmj.com](mailto:info.bmjopen@bmj.com)

# BMJ Open

## Impacts of type 2 diabetes mellitus and hypertension on cardiovascular disease and stroke in Chinese patients

|                               |                                                                                                                                                                                                                                                                                                                                |
|-------------------------------|--------------------------------------------------------------------------------------------------------------------------------------------------------------------------------------------------------------------------------------------------------------------------------------------------------------------------------|
| Journal:                      | <i>BMJ Open</i>                                                                                                                                                                                                                                                                                                                |
| Manuscript ID                 | bmjopen-2021-053698                                                                                                                                                                                                                                                                                                            |
| Article Type:                 | Original research                                                                                                                                                                                                                                                                                                              |
| Date Submitted by the Author: | 24-Jun-2021                                                                                                                                                                                                                                                                                                                    |
| Complete List of Authors:     | Liu, Yan; The Third People's Hospital of Datong, Department of Endocrinology<br>Li, Jie; The Third People's Hospital of Datong, Department of Endocrinology<br>Dou, Ying; Shanghai Ashermed Medical Technology Co LTD, Department of Medicine<br>ma, hongshan; The Third People's Hospital of Datong, Department of Cardiology |
| Keywords:                     | Hypertension < CARDIOLOGY, Stroke < NEUROLOGY, DIABETES & ENDOCRINOLOGY                                                                                                                                                                                                                                                        |
|                               |                                                                                                                                                                                                                                                                                                                                |

SCHOLARONE™  
Manuscripts

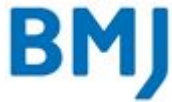

I, the Submitting Author has the right to grant and does grant on behalf of all authors of the Work (as defined in the below author licence), an exclusive licence and/or a non-exclusive licence for contributions from authors who are: i) UK Crown employees; ii) where BMJ has agreed a CC-BY licence shall apply, and/or iii) in accordance with the terms applicable for US Federal Government officers or employees acting as part of their official duties; on a worldwide, perpetual, irrevocable, royalty-free basis to BMJ Publishing Group Ltd ("BMJ") its licensees and where the relevant Journal is co-owned by BMJ to the co-owners of the Journal, to publish the Work in this journal and any other BMJ products and to exploit all rights, as set out in our [licence](#).

The Submitting Author accepts and understands that any supply made under these terms is made by BMJ to the Submitting Author unless you are acting as an employee on behalf of your employer or a postgraduate student of an affiliated institution which is paying any applicable article publishing charge ("APC") for Open Access articles. Where the Submitting Author wishes to make the Work available on an Open Access basis (and intends to pay the relevant APC), the terms of reuse of such Open Access shall be governed by a Creative Commons licence – details of these licences and which [Creative Commons](#) licence will apply to this Work are set out in our licence referred to above.

Other than as permitted in any relevant BMJ Author's Self Archiving Policies, I confirm this Work has not been accepted for publication elsewhere, is not being considered for publication elsewhere and does not duplicate material already published. I confirm all authors consent to publication of this Work and authorise the granting of this licence.

---

**Impacts of type 2 diabetes mellitus and hypertension on cardiovascular disease  
and stroke in Chinese patients**

Yan Liu<sup>1</sup>, Jie Li<sup>1</sup>, Ying Dou<sup>2</sup>, Hongshan Ma<sup>3,\*</sup>

<sup>1</sup>Department of Endocrinology, The Third People's Hospital of Datong, Datong  
037008, China.

<sup>2</sup>Department of Medicine, Shanghai Ashermed Medical Technology Co., LTD,  
Shanghai 200030, China.

<sup>3</sup>Department of Cardiology, The Third People's Hospital of Datong, Datong 037008,  
China.

\*Corresponding author

Hongshan Ma, Department of Cardiology, The Third People's Hospital of Datong,  
Datong 037008, China. Tel: +86-13681971726, Email: mahongshannew@163.com.

**Short title:** Impacts of T2DM and HTN on VE and stroke

---

## ABSTRACT

**Introduction** The prevalence of type 2 diabetes mellitus (T2DM) and hypertension (HTN) was largely increased in recent years. This study was performed for investigating the association of T2DM and HTN with combined vascular event (VE) and stroke risk.

**Methods** Patients aged  $\geq 18$  with diagnosis of T2DM and/or HTN were included from SuValue database. Non-T2DM and non-HTN patients were also included in this study as control. All patients were followed up for about 5 years.

**Findings** For the current study, 8,012 patients with T2DM, 9,653 patients with HTN and 3,592 patients with both T2DM, 10,561 patients without T2DM or HTN were included. T2DM was significantly associated with VE and stroke risk (hazard ratio 1.332, 95% CI 1.134-1.565 and HR 1.584, 95% CI 1.246-2.014, respectively; all P values  $< 0.001$ ). HTN was significantly associated with VE and stroke risk (HR 3.244, 95% CI 2.946-3.572 and HR 4.543, 95% CI 3.918-5.268, respectively; all P values  $< 0.0001$ ). T2DM combined with HTN was significantly associated with VE and stroke risk (HR 3.002, 95% CI 2.577-3.497 and HR 4.151, 95% CI 3.346-5.149, respectively; all P values  $< 0.0001$ ). HTN affected the risk of VE and stroke similarly in T2DM and non-T2DM subjects. HTN is more strongly associated with VE and stroke risk than T2DM (HR 2.435, 95% CI 2.113-2.805 and HR 2.868, 95% CI 2.341-3.513, respectively; all P values  $< 0.0001$ ).

**Interpretation** T2DM and/or HTN is strongly associated with VE and stroke risk and HTN is more strongly associated with VE and stroke risk comparing with T2DM.

---

**Keywords:** type 2 diabetes mellitus, hypertension, cardiovascular events, stroke, vascular events

### **Strengths and limitations of this study**

- This study included a large number of patients through hospital data (a total of 31,818 patients).
- Data information about cardiovascular risk factors were collected in this study.
- BMI and life style such as smoking and alcohol drinking were not accessed through electronic medical records.
- Mortality data were also not accessed through the HIS system in hospitals.
- We included patients who admitted to this hospital for the first time but we are not sure if he or she was firstly diagnosed as type 2 diabetes mellitus or hypertension, which make the included patients were heterogeneity.

---

## INTRODUCTION

The prevalence of type 2 diabetes mellitus (T2DM) has increased to 10.4% in 2013 from 0.67% in 1980 in China.<sup>1</sup> Hypertension (HTN) is found to be in over two-thirds of patients with common in diabetes patients and diabetes may causally affect HTN.<sup>2,3</sup> The development of HTN coincides with the development of hyperglycaemia.<sup>2</sup> Diabetes or HTN alone has been reported to be strong risk factor for cardiovascular diseases, all-cause mortality, coronary heart disease, ischemic heart disease and stroke in older adults in many studies.<sup>4-13</sup> According to the Framingham Heart Study, the rate of cardiovascular disease in adults with diabetes has absolute 2-fold risk of cardiovascular diseases comparing with subjects without diabetes.<sup>14</sup> Total cardiovascular disease burden in the diabetes patients has increased throughout the past four decades.<sup>2</sup> A cross-sectional study including newly diagnosed diabetes patients recruited for the UK prospective diabetes study showed that HTN is commonly in newly diabetes and HTN patients had a higher prevalence of cardiovascular events than normotensive subjects before the diagnosis of diabetes.<sup>15</sup> The co-existence of diabetes and HTN demonstrated a dramatically increased risk of cardiovascular disease by two to four times compared to the adults without HTN or diabetes.<sup>2</sup> Thus, diabetes and HTN are thought to be the bad companions and blood pressure control is critical in the diabetes patients combined with HTN. Besides, the impact of HTN on cardiovascular risk comparing with diabetes was still controversial. A study demonstrated that HTN had stronger association with atherosclerotic cardiovascular disease than diabetes.<sup>7</sup> Another study showed that patients with controlled diabetes have a similar

1  
2  
3  
4 cardiovascular risk to patients with HTN but without diabetes.<sup>2</sup>  
5  
6

7 Effect of hypertension and diabetes on cardiovascular disease have been investigated  
8  
9 in American, Finnish, Japanese and Iranian population.<sup>7 16-18</sup> However, there is no large-  
10  
11 scale study to assess the joint effect of HTN and diabetes on the cardiovascular events  
12  
13 in China. Based on the SuValue database, we retrospectively evaluated the impact of  
14  
15 HTN and T2DM on the cardiovascular disease and stroke in the Chinese adults in this  
16  
17 study.  
18  
19  
20  
21

## 22 **METHODS**

### 23 **Study Design**

24  
25 SuValue database is a big-data hospital information system (HIS) database in China,  
26  
27 including >90 million patients from 161 hospitals across 18 provinces in China.<sup>19</sup> This  
28  
29 is a retrospective cross-sectional study designed to evaluate the risk of cardiovascular  
30  
31 and stroke in patients with T2DM and/or HTN from 2004 to 2015. Patients were  
32  
33 included if they met the following criteria: (1) aged  $\geq 18$ ; (2) first outpatient visit to  
34  
35 hospitals (no diagnosis or medication records in previous records); (3) diagnosed with  
36  
37 T2DM only and/or HTN; (4) had the baseline examination records before or within 3  
38  
39 months since diagnosis (for details see the Section Baseline parameters); (5) follow-up  
40  
41 time larger than 1 time per year. Patients were excluded: sex information missing;  
42  
43 diagnosed with T2DM and/or HTN but without medication records; had been  
44  
45 diagnosed with stroke, myocardial infarction, coronary heart disease, heart failure, had  
46  
47 received coronary artery bypass grafting or percutaneous coronary intervention; with  
48  
49 abnormal kidney function (normal range for serum creatinine: 54-106  $\mu\text{mol/L}$  for men;  
50  
51  
52  
53  
54  
55  
56  
57  
58  
59  
60



1  
2  
3  
4 44-97  $\mu\text{mol/L}$  for women). We also included non-T2DM and non-HTN patients who  
5 performed the baseline examination but not from obstetrics and gynecology department,  
6 cancer department, neurology department and cardiology departments. In this analysis ,  
7 all patients' records were deidentified and anonymized. Authorization for SuValue  
8 database was obtained when the database was setup, so no ethics consideration or  
9 written informed patient consent was needed for this analysis.  
10  
11  
12  
13  
14  
15  
16  
17  
18  
19

### 20 **Baseline Parameters**

21  
22 Sex, age, triglyceride, total cholesterol, high-density lipoprotein cholesterol (HDL-C),  
23 low-density lipoprotein cholesterol (LDL-C), serum creatinine, fasting blood glucose,  
24 serum insulin, proteinuria, medication (antidiabetics and antihypertensive medications)  
25 at baseline were captured from electronic medical records within 3 months from the  
26 diagnosis of T2DM and/or HTN or non-T2DM and non-HTN.  
27  
28  
29  
30  
31  
32  
33  
34

### 35 **Outcomes and Follow-up**

36  
37 We examined 3 outcomes of interest, including the following: combined vascular event  
38 (VE; stroke, myocardial infarction, coronary heart disease, heart failure and coronary  
39 bypass, percutaneous coronary intervention) and stroke. The follow-up was defined by  
40 the first event of outcome or last record before December 31<sup>st</sup> 2019 in the event-free  
41 cases.  
42  
43  
44  
45  
46  
47  
48  
49

### 50 **Statistical Analyses**

51  
52 The categorical variables were described using frequency and percentage. The  
53 continuous variables were described using mean $\pm$ SD if normally distributed or median  
54 interquartile range if not. Baseline characteristics were compared for using ANOVA or  
55  
56  
57  
58  
59  
60

1  
2  
3  
4 Chi-square tests. Cox proportional hazards model was used to assess the association  
5  
6 between diseases and each of the outcomes, which was adjusted for cardiovascular risk  
7  
8 factors including gender, age, triglyceride, total cholesterol, HDL-C and LDL-C.  
9  
10 Unadjusted, sex- and age-adjusted and cardiovascular risk factors-adjusted hazard  
11  
12 ratios were obtained. A  $P < 0.05$  (two-sided) was considered as statistically significant.  
13  
14  
15 All statistical analyses were performed using SAS 9.4 (SAS Institute, Cary, NC, USA).  
16  
17  
18

## 19 20 **RESULTS**

21  
22 For the current study, 8,012 patients with T2DM only, 9,653 patients with HTN only  
23  
24 and 3,592 patients with both T2DM and HTN and 10,561 patients without T2DM or  
25  
26 HTN were selected from SuValue database. The median follow-up duration was 4.1  
27  
28 (2.4, 4.9) years. General characteristics of the study population at baseline are presented  
29  
30 in Table 1. Comparing baseline characteristics between the four groups revealed a  
31  
32 significant difference except for total cholesterol and serum insulin.  
33  
34  
35

36  
37 Kaplan–Meier analyses demonstrated an increased combined vascular event (VE) and  
38  
39 stroke risk according to the presence of diabetes mellitus without considering the  
40  
41 presence of HTN (Fig. 1A). In unadjusted models, comparing with non-HTN and non-  
42  
43 T2DM patients, prevalent diabetes mellitus was significantly associated with a 74.7%  
44  
45 increased risk of VE [95% confidence interval (CI) 1.566-1.949,  $P < 0.0001$ ] and 107.7%  
46  
47 increased risk of stroke (95% CI 1.755-2.459,  $P < 0.0001$ ). Further adjustment with the  
48  
49 age and sex and then with cardiovascular risk factors attenuated the association with  
50  
51 VE and stroke risk (HR 1.332, 95% CI 1.134-1.565 and HR 1.584, 95% CI 1.246-2.014,  
52  
53 respectively;  $P < 0.01$ , Table 2).  
54  
55  
56  
57  
58  
59  
60

1  
2  
3  
4 Kaplan–Meier analyses demonstrated an increased combined vascular event (VE) and  
5  
6 stroke risk according to the presence of HTN without considering the presence of  
7  
8 diabetes mellitus (Fig. 1B). Prevalent HTN was significantly associated with a 524.6%  
9  
10 increased risk of VE (95% CI 5.712-6.830) and 764.2% increased risk of stroke (95%  
11  
12 CI 7.517-9.934) in unadjusted models (all  $P$ s<0.0001). These associations were  
13  
14 attenuated but still significant after adjustment for age and sex and then other major  
15  
16 cardiovascular risk factors for both VE and stroke risk (HR 3.244, 95% CI 2.946-3.572  
17  
18 and HR 4.543, 95% CI 3.918-5.268, respectively; all  $P$ s<0.0001, Table 2).

19  
20 Kaplan–Meier analyses demonstrated reduced VE risk and stroke risk in those with  
21  
22 HTN and diabetes mellitus (Fig. 1C). Prevalent HTN and T2DM was significantly  
23  
24 associated with a 393.0% increased risk of VE (95% CI 4.93-5.474) and 499.0%  
25  
26 increased risk of stroke (95% CI 5.102-7.032) in unadjusted models (all  $P$ s<0.0001).  
27  
28 These associations were attenuated but still significant after adjustment for age and sex  
29  
30 and then other major cardiovascular risk factors for both VE risk and stroke risk (HR  
31  
32 3.002, 95% CI 2.577-3.497 and HR 4.151, 95% CI 3.346-5.149, respectively; all  
33  
34  $P$ s<0.0001, Table 2).

35  
36 Comparing with HTN, unadjusted hazard ratio for VE risk was 0.789 and for stroke  
37  
38 risk was 0.693 in those with T2DM and HTN (all  $P$ s<0.0001). But after adjustment with  
39  
40 major cardiovascular risk factors, there was no significant reduced risk for T2DM and  
41  
42 HTN comparing with HTN (Table 3).

43  
44 In unadjusted model, HTN and T2DM combined with HTN were associated with the  
45  
46 VE and stroke risk comparing with T2DM. After adjustment with age and sex and major  
47  
48  
49  
50  
51  
52  
53  
54  
55  
56  
57  
58  
59  
60

1  
2  
3  
4 cardiovascular risk factors, prevalent HTN and T2DM combined with HTN were still  
5  
6 significantly associated with VE and stroke risk (Table 4).  
7  
8

## 9 **DISCUSSION**

10  
11 In this present study, having HTN and/or T2DM was significantly associated with VE  
12  
13 and stroke before and after adjustment for major cardiovascular risk factors comparing  
14  
15 with the non-T2DM and non-HTN. The association of T2DM with the risk of both VE  
16  
17 and stroke risk attenuated after adjusting for major cardiovascular risk factors. HTN  
18  
19 affected the risk of VE and stroke similarly in T2DM and non-T2DM patients after  
20  
21 adjusting for major cardiovascular risk factors. Besides, HTN is more significantly  
22  
23 associated with VE and stroke risk than T2DM.  
24  
25  
26  
27  
28

29  
30 In unadjusted analyses and adjustment model for major cardiovascular risk factors, we  
31  
32 observed that patients with both T2DM and HTN showed increased risk of VE and  
33  
34 stroke comparing with those with T2DM, and the hazard ratios were significantly  
35  
36 increased from T2DM to both T2DM and HTN. However, after adjustment for major  
37  
38 cardiovascular risk factors, patients with T2DM and HTN were not significantly  
39  
40 increased with the VE and stroke risk comparing with HTN only. Similarly, a  
41  
42 prospective study of 49,582 Finnish subjects showed that HTN affected that risk of  
43  
44 stroke similarly in T2DM and non-T2DM subjects.<sup>20</sup> In this study, we included patients  
45  
46 with HTN and/or T2DM having medication administration record. A meta-analysis  
47  
48 study demonstrated that antihypertensive treatment decreased the risk of cardiovascular  
49  
50 disease and stroke among patients with a history of CVD or diabetes but without HTN.<sup>21</sup>  
51  
52  
53  
54  
55  
56  
57  
58 Thus, combined T2DM and HTN did not increase the risk of VE and stroke comparing  
59  
60

---

with HTN may be due to the antihypertensive treatment in this population.

Besides, we also observed that HTN was more associated with VE and stroke risk than T2DM alone. The results were similar with previous report that HTN was more related with all-cause and atherosclerotic cardiovascular disease than T2DM alone in community-dwelling older adults.<sup>7</sup> However, a study performed in Iranian older adults showed that T2DM alone increased the all-cause mortality by 62% comparing with HTN alone.<sup>18</sup> Thus, a prospective study was necessary to be performed for further analysis.

The current study has several significant strengths. First, this study included a large number of patients through hospital data. Second, data information about cardiovascular risk factors were collected in this study. However, there were several limitations in this study. First, BMI and life style such as smoking and alcohol drinking were not accessed through electronic medical records. Second, mortality data were also not accessed through the HIS system in hospitals. Third, we included patients who admitted to this hospital for the first time but we are not sure if he or she was firstly diagnosed as T2DM or HTN, which make the included patients were heterogeneity.

## CONCLUSIONS

In summary, HTN and/or T2DM was strongly associated with the increased risk of VE and stroke independent of conventional cardiovascular risk factors. T2DM seems not the risk of VE and stroke in HTN patients after adjusting for major cardiovascular risk factors. HTN is more significantly associated with VE and stroke risk than T2DM. However, a prospective study investigating the impact of HTN and/or T2DM on VE

1  
2  
3  
4 and stroke risk is needed to be performed.  
5  
6  
7  
8  
9  
10  
11  
12  
13  
14  
15  
16  
17  
18  
19  
20  
21  
22  
23  
24  
25  
26  
27  
28  
29  
30  
31  
32  
33  
34  
35  
36  
37  
38  
39  
40  
41  
42  
43  
44  
45  
46  
47  
48  
49  
50  
51  
52  
53  
54  
55  
56  
57  
58  
59  
60

---

For peer review only

---

## ACKNOWLEDGEMENTS

None

## FUNDING

The authors received no specific funding for this work.

## AUTHOR CONTRIBUTIONS

HSM and YL designed the study, analyzed the data, and wrote the first draft of the manuscript. HSM, YL, JL, and YD revised it critically for important intellectual content and approved the final version.

## DATA AVAILABILITY

All data relevant to the study were obtained from SuValue database which belongs to a third party and is not publicly available.

## Patient and Public Involvement

None.

## REFERENCES

- 1 Society CD. Guidelines for the prevention and treatment of type 2 diabetes in China (2017 edition). *J Chin J Diabetes* 2018;10:4-67.
- 2 Ferrannini E, Cushman WC. Diabetes and hypertension: the bad companions. *The Lancet* 2012;380(9841):601-10. doi: 10.1016/s0140-6736(12)60987-8
- 3 Sun D, Zhou T, Heianza Y, et al. Type 2 Diabetes and Hypertension. *Circ Res* 2019;124(6):930-37. doi: 10.1161/CIRCRESAHA.118.314487 [published Online First: 2019/01/17]
- 4 Kannel WB, Neaton JD, Wentworth D, et al. Overall and coronary heart disease mortality rates in relation to major risk factors in 325,348 men screened for the MRFIT. Multiple Risk Factor Intervention Trial. *American heart journal* 1986;112(4):825-36. doi: 10.1016/0002-8703(86)90481-3 [published Online First: 1986/10/01]

- 1  
2  
3  
4 5 Fox CS. Cardiovascular disease risk factors, type 2 diabetes mellitus, and the  
5 Framingham Heart Study. *Trends in cardiovascular medicine* 2010;20(3):90-5. doi:  
6 10.1016/j.tcm.2010.08.001 [published Online First: 2010/12/07]  
7  
8  
9  
10 6 Adab P, Cheng KK, Jiang CQ, et al. Age-specific relevance of usual blood pressure  
11 to vascular mortality. *Lancet (London, England)* 2003;361(9366):1391; author reply  
12 91-2. doi: 10.1016/s0140-6736(03)13063-2 [published Online First: 2003/04/25]  
13  
14  
15 7 Oh JY, Allison MA, Barrett-Connor E. Different impacts of hypertension and diabetes  
16 mellitus on all-cause and cardiovascular mortality in community-dwelling older adults:  
17 the Rancho Bernardo Study. *J Hypertens* 2017;35(1):55-62. doi:  
18 10.1097/HJH.0000000000001145 [published Online First: 2016/12/03]  
19  
20  
21  
22  
23 8 Ikeda A, Iso H, Yamagishi K, et al. Blood pressure and the risk of stroke,  
24 cardiovascular disease, and all-cause mortality among Japanese: the JPHC Study.  
25 *American journal of hypertension* 2009;22(3):273-80. doi: 10.1038/ajh.2008.356  
26 [published Online First: 2009/02/21]  
27  
28  
29  
30 9 Lotfaliany M, Akbarpour S, Mozafary A, et al. Hypertension phenotypes and incident  
31 cardiovascular disease and mortality events in a decade follow-up of a Middle East  
32 cohort. *J Hypertens* 2015;33(6):1153-61. doi: 10.1097/hjh.0000000000000540  
33 [published Online First: 2015/02/24]  
34  
35  
36  
37 10 Sarwar N, Gao P, Seshasai SR, et al. Diabetes mellitus, fasting blood glucose  
38 concentration, and risk of vascular disease: a collaborative meta-analysis of 102  
39 prospective studies. *Lancet (London, England)* 2010;375(9733):2215-22. doi:  
40 10.1016/s0140-6736(10)60484-9 [published Online First: 2010/07/09]  
41  
42  
43  
44 11 Huxley R, Barzi F, Woodward M. Excess risk of fatal coronary heart disease  
45 associated with diabetes in men and women: meta-analysis of 37 prospective cohort  
46 studies. *BMJ (Clinical research ed)* 2006;332(7533):73-8. doi:  
47 10.1136/bmj.38678.389583.7C [published Online First: 2005/12/24]  
48  
49  
50 12 Schramm TK, Gislason GH, Køber L, et al. Diabetes patients requiring glucose-  
51 lowering therapy and nondiabetics with a prior myocardial infarction carry the same  
52 cardiovascular risk: a population study of 3.3 million people. *Circulation*  
53  
54  
55  
56  
57  
58  
59  
60



2008;117(15):1945-54. doi: 10.1161/circulationaha.107.720847 [published Online First: 2008/04/02]

13 Almdal T, Scharling H, Jensen JS, et al. The independent effect of type 2 diabetes mellitus on ischemic heart disease, stroke, and death: a population-based study of 13,000 men and women with 20 years of follow-up. *Archives of internal medicine* 2004;164(13):1422-6. doi: 10.1001/archinte.164.13.1422 [published Online First: 2004/07/14]

14 Fox CS, Coady S, Sorlie PD, et al. Trends in cardiovascular complications of diabetes. *Jama* 2004;292(20):2495-9. doi: 10.1001/jama.292.20.2495 [published Online First: 2004/11/25]

15 Hypertension in Diabetes Study (HDS): I. Prevalence of hypertension in newly presenting type 2 diabetic patients and the association with risk factors for cardiovascular and diabetic complications. *J Hypertens* 1993;11(3):309-17. doi: 10.1097/00004872-199303000-00012 [published Online First: 1993/03/01]

16 Hu G, Jousilahti P, Tuomilehto J. Joint effects of history of hypertension at baseline and type 2 diabetes at baseline and during follow-up on the risk of coronary heart disease. *Eur Heart J* 2007;28(24):3059-66. doi: 10.1093/eurheartj/ehm501 [published Online First: 2007/11/06]

17 Kokubo Y, Okamura T, Watanabe M, et al. The combined impact of blood pressure category and glucose abnormality on the incidence of cardiovascular diseases in a Japanese urban cohort: the Suita Study. *Hypertens Res* 2010;33(12):1238-43. doi: 10.1038/hr.2010.174 [published Online First: 2010/10/12]

18 Zafari N, Asgari S, Lotfaliany M, et al. Impact Of Hypertension versus Diabetes on Cardiovascular and All-cause Mortality in Iranian Older Adults: Results of 14 Years of Follow-up. *Sci Rep* 2017;7(1):14220. doi: 10.1038/s41598-017-14631-2 [published Online First: 2017/10/29]

19 Wang C, Gao Y, Zhu L, et al. Treatment Patterns in Patients With Newly Diagnosed Type 2 Diabetes in China: A Retrospective, Longitudinal Database Study. *Clinical therapeutics* 2019;41(8):1440-52. doi: 10.1016/j.clinthera.2019.05.003 [published

1  
2  
3  
4 Online First: 2019/06/04]

5  
6 20 Hu G, Sarti C, Jousilahti P, et al. The impact of history of hypertension and type 2  
7 diabetes at baseline on the incidence of stroke and stroke mortality. *Stroke*  
8 2005;36(12):2538-43. doi: 10.1161/01.Str.0000190894.30964.75 [published Online  
9 First: 2005/11/12]

10  
11  
12  
13 21 Thompson AM, Hu T, Eshelbrenner CL, et al. Antihypertensive Treatment and  
14 Secondary Prevention of Cardiovascular Disease Events Among Persons Without  
15 Hypertension: A Meta-analysis. *JAMA* 2011;305(9):913-22. doi:  
16 10.1001/jama.2011.250 %J JAMA  
17  
18  
19  
20  
21  
22  
23  
24  
25  
26  
27  
28  
29  
30  
31  
32  
33  
34  
35  
36  
37  
38  
39  
40  
41  
42  
43  
44  
45  
46  
47  
48  
49  
50  
51  
52  
53  
54  
55  
56  
57  
58  
59  
60

**Table 1 Baseline characteristics of included patients.**

|                                                | <b>HTN only</b> | <b>T2DM only</b>   | <b>T2DM and HTN</b> | <b>Non-T2DM<br/>and non-HTN</b> | <b>P<br/>value</b> |
|------------------------------------------------|-----------------|--------------------|---------------------|---------------------------------|--------------------|
| <b>Total</b>                                   | 9,653           | 8,012              | 3,592               | 10561                           |                    |
| <b>Sex</b>                                     |                 |                    |                     |                                 |                    |
| Male                                           | 4,419 (45.8%)   | 4,006 (50.0%)      | 1,634 (45.5%)       | 4889 (46.3%)                    | -                  |
| Female                                         | 5,234 (54.2%)   | 4,006 (50.0%)      | 1,958 (54.5%)       | 5672 (53.7%)                    | -                  |
| <b>Age</b>                                     |                 |                    |                     |                                 |                    |
| 18-29 (n, %)                                   | 79 (0.8%)       | 204 (2.5%)         | 31 (0.9%)           | 1372 (13.0%)                    | -                  |
| 30-39 (n, %)                                   | 602 (6.2%)      | 831 (10.4%)        | 139 (3.9%)          | 2439 (23.1%)                    | -                  |
| 40-49 (n, %)                                   | 1,856 (19.2%)   | 2,323 (29.0%)      | 553 (15.4%)         | 3227 (30.6%)                    | -                  |
| 50-59 (n, %)                                   | 1,856 (20.7%)   | 2,297 (28.7%)      | 927 (25.8%)         | 1954 (18.5%)                    | -                  |
| 60-69 (n, %)                                   | 2,552 (26.4%)   | 1,704 (21.3%)      | 1,194 (33.2%)       | 1179 (11.2%)                    | -                  |
| 70-79 (n, %)                                   | 1,715 (17.8%)   | 556 (6.9%)         | 573 (16.0%)         | 336 (3.2%)                      | -                  |
| ≥80 (n, %)                                     | 852 (8.8%)      | 97 (1.2%)          | 175 (4.9%)          | 54 (0.5%)                       | -                  |
| <b>Triglyceride<br/>(mmol/L)</b>               | 1.86 (1.54)     | 2.35 (2.55)        | 2.29 (1.85)         | 1.71 (1.65)                     | <.0001             |
| <b>Total<br/>cholesterol<br/>(mmol/L)</b>      | 5.31 (1.19)     | 5.32 (1.41)        | 5.29 (1.28)         | 5.28 (1.15)                     | 0.3506             |
| <b>HDL-C<br/>(mmol/L)</b>                      | 1.41 (0.41)     | 1.25 (0.45)        | 1.26 (0.39)         | 1.40 (0.39)                     | <.0001             |
| <b>LDL-C<br/>(mmol/L)</b>                      | 3.17 (1.00)     | 3.07 (1.03)        | 3.02 (0.98)         | 3.03 (0.90)                     | <.0001             |
| <b>Serum<br/>creatinine<br/>(µmol/L)</b>       | 81.11 (39.35)   | 70.57 (23.94)      | 84.26 (59.38)       | 76.78 (20.42)                   | <.0001             |
| <b>HbA1c (%)</b>                               | 5.58 (1.38)     | 9.41 (3.11)        | 8.41 (2.63)         | 5.73 (1.31)                     | <.0001             |
| <b>Fasting blood-<br/>glucose<br/>(mmol/L)</b> | 5.76 (1.28)     | 11.15 (5.28)       | 9.88 (5.14)         | 5.58 (1.13)                     | <.0001             |
| <b>Serum insulin<br/>(pmol/liter)</b>          | 95.63 (60.05)   | 117.64<br>(288.36) | 78.43 (57.89)       | 9.98 (3.21)                     | 0.6502             |
| <b>Proteinuria<br/>(positive)</b>              | 310 (3.2%)      | 145 (1.8%)         | 126 (3.5%)          | 143 (1.4%)                      | <.0001             |
| <b>Diabetes<br/>complications</b>              |                 |                    |                     |                                 |                    |
| Diabetic<br>nephropathy                        | -               | 450 (5.6%)         | 446 (12.4%)         | -                               | -                  |
| Diabetic<br>retinopathy                        | -               | 313 (3.9%)         | 159 (4.4%)          | -                               | -                  |

|                                      |   |            |            |   |   |
|--------------------------------------|---|------------|------------|---|---|
| Diabetic neuropathy                  | - | 462 (5.8%) | 225 (6.3%) | - | - |
| Diabetic lower limb vascular disease | - | 7 (0.09%)  | 15 (0.42%) | - | - |
| Diabetic foot                        | - | 80 (1.0%)  | 61 (1.7%)  | - | - |

HTN: hypertension; T2DM: type 2 diabetes mellitus; HDL-C: high density lipoprotein cholesterol; LDL-C: low density lipoprotein cholesterol. For continuous variables, data were presented as mean (SD) and P values for four groups were calculated using ANOVA test. For categorical variables, data were presented as number (frequency) and P values for four groups were calculated using Chi-square test.

**Table 2 Association of type 2 diabetes mellitus (T2DM) and/or hypertension (HTN) with combined vascular event and stroke comparing with non-T2DM and non-HTN.**

|                              | Combined vascular event (VE) |         | Stroke               |         |
|------------------------------|------------------------------|---------|----------------------|---------|
|                              | HR (95% CI)                  | P value | HR (95% CI)          | P value |
| <b>Unadjusted</b>            |                              |         |                      |         |
| Non-T2DM and non-HTN         | 1 (reference)                |         | 1 (reference)        |         |
| T2DM only                    | 1.747 (1.566, 1.949)         | <.0001  | 2.077 (1.755, 2.459) | <.0001  |
| HTN only                     | 6.246 (5.712, 6.830)         | <.0001  | 8.642 (7.517, 9.934) | <.0001  |
| T2DM and HTN                 | 4.930 (4.93, 5.474)          | <.0001  | 5.990 (5.102, 7.032) | <.0001  |
| <b>Age- and sex-adjusted</b> |                              |         |                      |         |
| Non-T2DM and non-HTN         | 1 (reference)                |         | 1 (reference)        |         |
| T2DM only                    | 1.258 (1.127, 1.405)         | <.0001  | 1.464 (1.235, 1.735) | <.0001  |
| HTN only                     | 3.344 (3.046, 3.670)         | <.0001  | 4.409 (3.817, 5.093) | <.0001  |
| T2DM and HTN                 | 2.595 (2.329, 2.892)         | <.0001  | 3.021 (2.561, 3.563) | <.0001  |
| <b>Risk factors-adjusted</b> |                              |         |                      |         |
| Non-T2DM and non-HTN         | 1 (reference)                |         | 1 (reference)        |         |
| T2DM only                    | 1.332 (1.134, 1.565)         | 0.0005  | 1.584 (1.246, 2.014) | <.0001  |
| HTN only                     | 3.244 (2.946, 3.572)         | <.0001  | 4.543 (3.918, 5.268) | <.0001  |
| T2DM and HTN                 | 3.002 (2.577, 3.497)         | <.0001  | 4.151 (3.346, 5.149) | <.0001  |

CI, confidence interval; VE, combined vascular event; T2DM, type 2 diabetes mellitus;

HR, hazard ratio; HTN, hypertension. Risk factors include age, sex, triglycerides, total cholesterol, high density lipoprotein cholesterol, low density lipoprotein cholesterol.

**Table 3 Association of type 2 diabetes mellitus (T2DM) and hypertension (HTN) with combined vascular event and stroke comparing with HTN only.**

|                              | Combined vascular event (VE) |         | Stroke               |         |
|------------------------------|------------------------------|---------|----------------------|---------|
|                              | HR (95% CI)                  | P value | HR (95% CI)          | P value |
| <b>Unadjusted</b>            |                              |         |                      |         |
| HTN only                     | 1 (reference)                |         | 1 (reference)        |         |
| T2DM and HTN                 | 0.789 (0.732, 0.851)         | <.0001  | 0.693 (0.624, 0.769) | <.0001  |
| <b>Age- and sex-adjusted</b> |                              |         |                      |         |
| HTN only                     | 1 (reference)                |         | 1 (reference)        |         |
| T2DM and HTN                 | 0.776 (0.720, 0.836)         | <.0001  | 0.685 (0.617, 0.761) | <.0001  |
| <b>Risk factors-adjusted</b> |                              |         |                      |         |
| HTN only                     | 1 (reference)                |         | 1 (reference)        |         |
| T2DM and HTN                 | 0.925 (0.814, 1.052)         | 0.2352  | 0.914 (0.771, 1.082) | 0.2959  |

CI, confidence interval; VE, combined vascular event; T2DM, type 2 diabetes mellitus;

HR, hazard ratio; HTN, hypertension. Risk factors include age, sex, triglycerides, total cholesterol, high density lipoprotein cholesterol, low density lipoprotein cholesterol.

**Table 4 Association of type 2 diabetes mellitus (T2DM) and/or hypertension (HTN) with combined vascular event and stroke comparing with T2DM only.**

|                              | Combined vascular event (VE) |         | Stroke               |         |
|------------------------------|------------------------------|---------|----------------------|---------|
|                              | HR (95% CI)                  | P value | HR (95% CI)          | P value |
| <b>Unadjusted</b>            |                              |         |                      |         |
| T2DM only                    | 1 (reference)                |         | 1 (reference)        |         |
| HTN only                     | 3.575 (3.296, 3.877)         | <.0001  | 4.160 (3.701, 4.675) | <.0001  |
| T2DM and HTN                 | 2.821 (2.558, 3.112)         | <.0001  | 2.883 (2.504, 3.321) | <.0001  |
| <b>Age- and sex-adjusted</b> |                              |         |                      |         |
| T2DM only                    | 1 (reference)                |         | 1 (reference)        |         |
| HTN only                     | 2.657 (2.447, 2.885)         | <.0001  | 3.011 (2.676, 3.389) | <.0001  |
| T2DM and HTN                 | 2.062 (1.868, 2.276)         | <.0001  | 2.063 (1.789, 2.379) | <.0001  |
| <b>Risk factors-adjusted</b> |                              |         |                      |         |
| T2DM only                    | 1 (reference)                |         | 1 (reference)        |         |
| HTN only                     | 2.435 (2.113, 2.805)         | <.0001  | 2.868 (2.341, 3.513) | <.0001  |
| T2DM and HTN                 | 2.253 (1.876, 2.706)         | <.0001  | 2.620 (2.031, 3.380) | <.0001  |

CI, confidence interval; VE, combined vascular event; T2DM, type 2 diabetes mellitus;

HR, hazard ratio; HTN, hypertension. Risk factors include age, sex, triglycerides, total cholesterol, high density lipoprotein cholesterol, low density lipoprotein cholesterol.

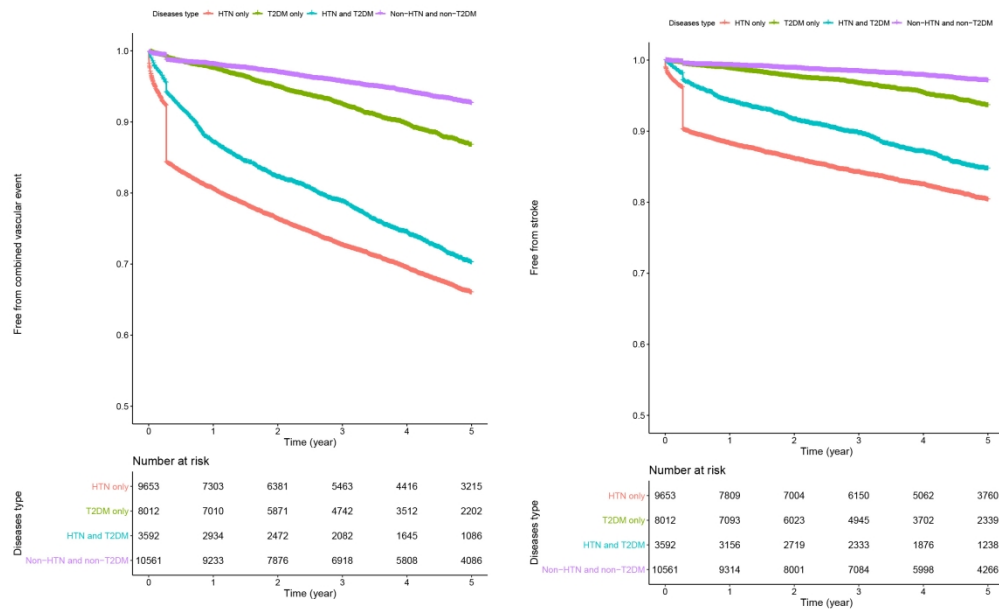

Figure 1 Kaplan–Meier survival curve of combined vascular event (VE) and stroke according to the presence of type 2 diabetes mellitus (T2DM) and hypertension (HTN).

479x294mm (150 x 150 DPI)



STROBE Statement—Checklist of items that should be included in reports of *cross-sectional studies*

|                              | Item No | Recommendation                                                                                                                                                                                               | Page No |
|------------------------------|---------|--------------------------------------------------------------------------------------------------------------------------------------------------------------------------------------------------------------|---------|
| <b>Title and abstract</b>    | 1       | (a) Indicate the study's design with a commonly used term in the title or the abstract                                                                                                                       | 1, 2    |
|                              |         | (b) Provide in the abstract an informative and balanced summary of what was done and what was found                                                                                                          | 2       |
| <b>Introduction</b>          |         |                                                                                                                                                                                                              |         |
| Background/rationale         | 2       | Explain the scientific background and rationale for the investigation being reported                                                                                                                         | 4, 5    |
| Objectives                   | 3       | State specific objectives, including any prespecified hypotheses                                                                                                                                             | 5       |
| <b>Methods</b>               |         |                                                                                                                                                                                                              |         |
| Study design                 | 4       | Present key elements of study design early in the paper                                                                                                                                                      | 5       |
| Setting                      | 5       | Describe the setting, locations, and relevant dates, including periods of recruitment, exposure, follow-up, and data collection                                                                              | 5, 6    |
| Participants                 | 6       | (a) Give the eligibility criteria, and the sources and methods of selection of participants                                                                                                                  | 5, 6    |
| Variables                    | 7       | Clearly define all outcomes, exposures, predictors, potential confounders, and effect modifiers. Give diagnostic criteria, if applicable                                                                     | 6       |
| Data sources/<br>measurement | 8*      | For each variable of interest, give sources of data and details of methods of assessment (measurement). Describe comparability of assessment methods if there is more than one group                         | 5, 6    |
| Bias                         | 9       | Describe any efforts to address potential sources of bias                                                                                                                                                    | 5, 6    |
| Study size                   | 10      | Explain how the study size was arrived at                                                                                                                                                                    | 7       |
| Quantitative variables       | 11      | Explain how quantitative variables were handled in the analyses. If applicable, describe which groupings were chosen and why                                                                                 | 5, 6    |
| Statistical methods          | 12      | (a) Describe all statistical methods, including those used to control for confounding                                                                                                                        | 6, 7    |
|                              |         | (b) Describe any methods used to examine subgroups and interactions                                                                                                                                          | NA      |
|                              |         | (c) Explain how missing data were addressed                                                                                                                                                                  | NA      |
|                              |         | (d) If applicable, describe analytical methods taking account of sampling strategy                                                                                                                           | NA      |
|                              |         | (e) Describe any sensitivity analyses                                                                                                                                                                        | NA      |
| <b>Results</b>               |         |                                                                                                                                                                                                              |         |
| Participants                 | 13*     | (a) Report numbers of individuals at each stage of study—eg numbers potentially eligible, examined for eligibility, confirmed eligible, included in the study, completing follow-up, and analysed            | 7       |
|                              |         | (b) Give reasons for non-participation at each stage                                                                                                                                                         | NA      |
|                              |         | (c) Consider use of a flow diagram                                                                                                                                                                           | NA      |
| Descriptive data             | 14*     | (a) Give characteristics of study participants (eg demographic, clinical, social) and information on exposures and potential confounders                                                                     | 7, 8    |
|                              |         | (b) Indicate number of participants with missing data for each variable of interest                                                                                                                          | 7, 8    |
| Outcome data                 | 15*     | Report numbers of outcome events or summary measures                                                                                                                                                         | 7, 8    |
| Main results                 | 16      | (a) Give unadjusted estimates and, if applicable, confounder-adjusted estimates and their precision (eg, 95% confidence interval). Make clear which confounders were adjusted for and why they were included | 7, 8    |

|                          |    |                                                                                                                                                                            |       |
|--------------------------|----|----------------------------------------------------------------------------------------------------------------------------------------------------------------------------|-------|
|                          |    | (b) Report category boundaries when continuous variables were categorized                                                                                                  | 7, 8  |
|                          |    | (c) If relevant, consider translating estimates of relative risk into absolute risk for a meaningful time period                                                           | NA    |
| Other analyses           | 17 | Report other analyses done—eg analyses of subgroups and interactions, and sensitivity analyses                                                                             | NA    |
| <b>Discussion</b>        |    |                                                                                                                                                                            |       |
| Key results              | 18 | Summarise key results with reference to study objectives                                                                                                                   | 9, 10 |
| Limitations              | 19 | Discuss limitations of the study, taking into account sources of potential bias or imprecision. Discuss both direction and magnitude of any potential bias                 | 10    |
| Interpretation           | 20 | Give a cautious overall interpretation of results considering objectives, limitations, multiplicity of analyses, results from similar studies, and other relevant evidence | 9, 10 |
| Generalisability         | 21 | Discuss the generalisability (external validity) of the study results                                                                                                      | 9, 10 |
| <b>Other information</b> |    |                                                                                                                                                                            |       |
| Funding                  | 22 | Give the source of funding and the role of the funders for the present study and, if applicable, for the original study on which the present article is based              | 11    |

\*Give information separately for exposed and unexposed groups.

**Note:** An Explanation and Elaboration article discusses each checklist item and gives methodological background and published examples of transparent reporting. The STROBE checklist is best used in conjunction with this article (freely available on the Web sites of PLoS Medicine at <http://www.plosmedicine.org/>, Annals of Internal Medicine at <http://www.annals.org/>, and Epidemiology at <http://www.epidem.com/>). Information on the STROBE Initiative is available at [www.strobe-statement.org](http://www.strobe-statement.org).

# BMJ Open

## Impacts of type 2 diabetes mellitus and hypertension on the incidence of cardiovascular diseases and stroke in China real-world setting: A retrospective, cohort study

|                                 |                                                                                                                                                                                                                                                                                                                                |
|---------------------------------|--------------------------------------------------------------------------------------------------------------------------------------------------------------------------------------------------------------------------------------------------------------------------------------------------------------------------------|
| Journal:                        | <i>BMJ Open</i>                                                                                                                                                                                                                                                                                                                |
| Manuscript ID                   | bmjopen-2021-053698.R1                                                                                                                                                                                                                                                                                                         |
| Article Type:                   | Original research                                                                                                                                                                                                                                                                                                              |
| Date Submitted by the Author:   | 06-Oct-2021                                                                                                                                                                                                                                                                                                                    |
| Complete List of Authors:       | Liu, Yan; The Third People's Hospital of Datong, Department of Endocrinology<br>Li, Jie; The Third People's Hospital of Datong, Department of Endocrinology<br>Dou, Ying; Shanghai Ashermed Medical Technology Co LTD, Department of Medicine<br>Ma, Hongshan; The Third People's Hospital of Datong, Department of Cardiology |
| <b>Primary Subject Heading</b>: | Diabetes and endocrinology                                                                                                                                                                                                                                                                                                     |
| Secondary Subject Heading:      | Public health                                                                                                                                                                                                                                                                                                                  |
| Keywords:                       | Hypertension < CARDIOLOGY, Stroke < NEUROLOGY, DIABETES & ENDOCRINOLOGY                                                                                                                                                                                                                                                        |
|                                 |                                                                                                                                                                                                                                                                                                                                |

SCHOLARONE™  
Manuscripts

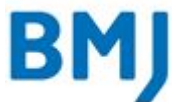

I, the Submitting Author has the right to grant and does grant on behalf of all authors of the Work (as defined in the below author licence), an exclusive licence and/or a non-exclusive licence for contributions from authors who are: i) UK Crown employees; ii) where BMJ has agreed a CC-BY licence shall apply, and/or iii) in accordance with the terms applicable for US Federal Government officers or employees acting as part of their official duties; on a worldwide, perpetual, irrevocable, royalty-free basis to BMJ Publishing Group Ltd ("BMJ") its licensees and where the relevant Journal is co-owned by BMJ to the co-owners of the Journal, to publish the Work in this journal and any other BMJ products and to exploit all rights, as set out in our [licence](#).

The Submitting Author accepts and understands that any supply made under these terms is made by BMJ to the Submitting Author unless you are acting as an employee on behalf of your employer or a postgraduate student of an affiliated institution which is paying any applicable article publishing charge ("APC") for Open Access articles. Where the Submitting Author wishes to make the Work available on an Open Access basis (and intends to pay the relevant APC), the terms of reuse of such Open Access shall be governed by a Creative Commons licence – details of these licences and which [Creative Commons](#) licence will apply to this Work are set out in our licence referred to above.

Other than as permitted in any relevant BMJ Author's Self Archiving Policies, I confirm this Work has not been accepted for publication elsewhere, is not being considered for publication elsewhere and does not duplicate material already published. I confirm all authors consent to publication of this Work and authorise the granting of this licence.

---

**Impacts of type 2 diabetes mellitus and hypertension on the incidence of cardiovascular diseases and stroke in China real-world setting: A retrospective, cohort study**

Yan Liu<sup>1</sup>, Jie Li<sup>1</sup>, Ying Dou<sup>2</sup>, Hongshan Ma<sup>3,\*</sup>

<sup>1</sup>Department of Endocrinology, The Third People's Hospital of Datong, Datong 037008, China.

<sup>2</sup>Department of Medicine, Shanghai Ashermed Medical Technology Co., LTD, Shanghai 200030, China.

<sup>3</sup>Department of Cardiology, The Third People's Hospital of Datong, Datong 037008, China.

\*Corresponding author

Hongshan Ma, Department of Cardiology, The Third People's Hospital of Datong, Datong 037008, China. Tel: +86-13681971726, Email: mahongshannew@163.com.

**Short title:** Impacts of T2DM and HTN on combined VE and stroke risk

---

## ABSTRACT

**Objective** The prevalence of type 2 diabetes mellitus (T2DM) and hypertension (HTN) has largely increased in recent years. However, there is little evidence from large-scale study to assess the joint effect of T2DM and HTN on the risk of cardiovascular events in China. This study was performed to investigate the association of T2DM and HTN with the incidence of combined vascular event (VE) and stroke in China.

**Design** A retrospective cohort study.

**Setting** Data were collected from the SuValue database which includes electronic medical records of >90 million patients from 161 hospitals across 18 provinces in China.

**Participants** Patients aged  $\geq 18$  with diagnosis of T2DM and/or HTN were included. Non-T2DM and non-HTN patients were included in this study as control.

**Outcomes** Incidence of combined vascular event (VE) and stroke during the study.

**Results** For the current study, 8,012 patients with T2DM, 9,653 patients with HTN and 3,592 patients with both T2DM and HTN, 10,561 patients without T2DM or HTN were included. T2DM was significantly associated with combined VE and stroke risk (hazard ratio 1.332, 95% CI 1.134-1.565 and HR 1.584, 95% CI 1.246-2.014, respectively). HTN was significantly associated with combined VE and stroke risk (HR 3.244, 95% CI 2.946-3.572 and HR 4.543, 95% CI 3.918-5.268, respectively). T2DM combined with HTN was significantly associated with combined VE and stroke risk (HR 3.002, 95% CI 2.577-3.497 and HR 4.151, 95% CI 3.346-5.149, respectively). HTN was more strongly associated with combined VE and stroke risk than T2DM (HR 2.435, 95% CI 2.113-2.805 and HR 2.868, 95% CI 2.341-3.513, respectively).

---

**Conclusion** Subjects with T2DM and HTN were strongly associated with combined VE and stroke risk, however, the HTN only group was more strongly associated with combined VE and stroke risk compared with the T2DM only group.

**Keywords:** type 2 diabetes mellitus, hypertension, cardiovascular events, stroke, vascular events

### **Strengths and limitations of this study**

#### **Strengths of this study**

- This study included large number of patients in real-world setting (a total of 31,818 patients).
- Cardiovascular risk factors were collected in this study.

#### **Limitations of this study**

- BMI and life style such as smoking and alcohol drinking were not accessed through electronic medical records in hospitals.
- Mortality data were not accessed through the electronic medical records in hospitals.

---

## INTRODUCTION

The prevalence of type 2 diabetes mellitus (T2DM) has increased to 10.4% in 2013 and 11.2% in 2015 from 0.67% in 1980 in China.<sup>1 2</sup> Hypertension (HTN) has been found to be common in over two-thirds of patients with diabetes.<sup>3 4</sup> The development of HTN coincides with the development of hyperglycaemia.<sup>3</sup> Insulin resistance and hyperinsulinaemia might promote atherogenesis, thereby affecting blood pressure homeostasis.<sup>5 6</sup>

Diabetes has been reported to be strong risk factor for cardiovascular diseases, all-cause mortality, coronary heart disease, ischemic heart disease and stroke in many studies.<sup>7-</sup>

<sup>11</sup> According to the Framingham Heart Study, adults with diabetes had absolute 2-fold risk of cardiovascular diseases compared with subjects without diabetes.<sup>12</sup> Total cardiovascular disease burden in the diabetes patients has increased throughout the past four decades.<sup>3</sup> A cross-sectional study showed that HTN was commonly in newly diagnosed diabetes and HTN patients had a higher prevalence of cardiovascular events than normotensive subjects before the diagnosis of diabetes.<sup>13</sup> Hypertension has also been reported to be one of the strongest risk factors for cardiovascular diseases including coronary disease, vascular heart diseases, and cerebral stroke.<sup>14-20</sup> The co-existence of diabetes and HTN demonstrated a dramatically increased risk of cardiovascular disease by two to four times compared to the adults without HTN or diabetes.<sup>3</sup> Thus, diabetes and HTN are thought to be the bad companions and blood pressure control is critical in the diabetes patients combined with HTN. Besides, a study demonstrated that HTN had stronger association with atherosclerotic cardiovascular



1  
2  
3  
4 disease than diabetes.<sup>21</sup>  
5  
6

7 Effect of hypertension and diabetes on the risk of cardiovascular disease have been  
8  
9 investigated in American, Finnish, Japanese and Iranian population.<sup>21-24</sup> However, there  
10  
11 is little evidence from large-scale study to assess the joint effect of HTN and diabetes  
12  
13 on the risk of cardiovascular events in China. The purpose of the study was to evaluate  
14  
15 the impact of HTN and T2DM on the risk of cardiovascular disease and stroke in the  
16  
17 Chinese adults using the SuValue database.  
18  
19

## 20 21 22 **METHODS**

### 23 24 25 **Study Design**

26 SuValue database is a big-data hospital information system (HIS) database,  
27  
28 including >90 million patients from 161 hospitals across 18 provinces in China.<sup>25</sup> This  
29  
30 was a retrospective, cohort study designed to evaluate the risk of cardiovascular  
31  
32 diseases and stroke in patients with T2DM and/or HTN from 2004 to 2015 in China  
33  
34 real-world setting. Patients were included if they met the following criteria: (1) aged  $\geq 18$ ;  
35  
36 (2) newly diagnosed T2DM and/or HTN; (3) had the baseline examination records  
37  
38 before or within 3 months at the first diagnosis (details of baseline examination were  
39  
40 described in the Baseline Parameters section); (4) EMRs could be found in one year  
41  
42 later after the first diagnosis of T2DM and/or HTN. Patients were excluded as follows:  
43  
44 sex information missing; had been diagnosed with stroke, myocardial infarction,  
45  
46 coronary heart disease, heart failure, had received coronary artery bypass grafting or  
47  
48 percutaneous coronary intervention before the first diagnosis of T2DM and/or HTN;  
49  
50 with abnormal kidney function (normal range for serum creatinine: 54-106  $\mu\text{mol/L}$  for  
51  
52  
53  
54  
55  
56  
57  
58  
59  
60

men; 44-97  $\mu\text{mol/L}$  for women). We also included non-T2DM and non-HTN patients who performed the baseline examination but not from obstetrics and gynecology department, cancer department, neurology department and cardiology department. Authorization for SuValue database was obtained when the database was setup, so both ethics consideration and written informed patient consent were not needed for this analysis. Besides, all patients' electronic medical records (EMRs) were deidentified and anonymized when the SuValue database was constructed.

### **Baseline Parameters**

Sex, age, triglyceride, total cholesterol, high-density lipoprotein cholesterol (HDL-C), low-density lipoprotein cholesterol (LDL-C), serum creatinine, fasting blood glucose, serum insulin, proteinuria, medication (antidiabetics and antihypertensive medications) at baseline were captured from EMRs before or within 3 months at the first diagnosis of T2DM and/or HTN.

### **Outcomes**

We examined two outcomes of interest: combined vascular event (VE) and stroke. Combined VE include stroke, myocardial infarction, coronary heart disease, heart failure and coronary bypass, percutaneous coronary intervention. The outcomes were defined as the first event or last record before December 31, 2019 in the event-free cases according to the diagnosis in the patients' EMRs.

### **Statistical Analyses**

The categorical variables were described using frequency and percentage. The continuous variables were described using mean (SD) if normally distributed or median

interquartile range if not. Baseline characteristics were compared using ANOVA or Chi-square tests. Kaplan–Meier survival analysis of the incidence of combined VE and stroke by the presence of T2DM and/or HTN was performed. Cox proportional hazards model was used to assess the association between diseases and each outcome, which was adjusted for cardiovascular risk factors including gender, age, triglyceride, total cholesterol, HDL-C and LDL-C. Unadjusted, sex- and age-adjusted and cardiovascular risk factors–adjusted hazard ratios were obtained. A  $P < 0.05$  (two-sided) was considered as statistically significant. All statistical analyses were performed using SAS 9.4 (SAS Institute, Cary, NC, USA).

#### **Public and Patient involvement**

Patients and/or the public were not involved in the design, or conduct, or reporting, or dissemination plans of this research.

#### **RESULTS**

For the current study, 8,012 patients with T2DM only, 9,653 patients with HTN only and 3,592 patients with both T2DM and HTN and 10,561 patients without T2DM or HTN were selected from the SuValue database. The median follow-up duration was 4.1 (2.4, 4.9) years. General characteristics of the study population at baseline are presented in Table 1. Comparing baseline characteristics between the four groups revealed significant differences except for total cholesterol ( $p=0.3506$ ) and serum insulin ( $p=0.6502$ ).

Kaplan–Meier analyses demonstrated increased combined VE and stroke risk in the HTN group (Fig. 1). In unadjusted models, compared with non-HTN and non-T2DM

1  
2  
3  
4 patients, the HR of T2DM was 1.747 for combined VE [95% confidence interval (CI)  
5  
6 1.566-1.949,  $P<0.0001$ ] and 2.077 for stroke (95% CI 1.755-2.459,  $P<0.0001$ ). Further  
7  
8 adjustment with the age and sex and then with cardiovascular risk factors attenuated  
9  
10 the association of T2DM with combined VE and stroke risk (HR 1.332, 95% CI 1.134-  
11  
12 1.565 and HR 1.584, 95% CI 1.246-2.014, respectively;  $P<0.001$ , Table 2).

13  
14  
15  
16  
17 Kaplan–Meier analyses demonstrated increased combined VE and stroke risk in the  
18  
19 HTN group (Fig. 1). HTN only group had more than 6-fold increased risk of combined  
20  
21 VE (95% CI 5.712-6.830) and more than 8-fold increased risk of stroke (95% CI 7.517-  
22  
23 9.934) in unadjusted models (all  $P_s<0.0001$ ). These associations were attenuated but  
24  
25 still significant after adjustment for age and sex and then other major cardiovascular  
26  
27 risk factors for both combined VE and stroke risk (HR 3.244, 95% CI 2.946-3.572 and  
28  
29 HR 4.543, 95% CI 3.918-5.268, respectively; all  $P_s<0.0001$ , Table 2).

30  
31  
32  
33  
34  
35 Kaplan–Meier analyses demonstrated increased combined VE and stroke risk in the  
36  
37 HTN and T2DM group (Fig. 1). For combined VE, the HR of HTN and T2DM group  
38  
39 was 4.93 (95% CI 4.93-5.474). HTN and T2DM group increased the risk of stroke to  
40  
41 5.990 (95% CI 5.102-7.032) in unadjusted models (all  $P_s<0.0001$ ). These associations  
42  
43 were attenuated but still significant after adjustment for age and sex and then other  
44  
45 major cardiovascular risk factors for both combined VE risk and stroke risk (HR 3.002,  
46  
47 95% CI 2.577-3.497 and HR 4.151, 95% CI 3.346-5.149, respectively; all  $P_s<0.0001$ ,  
48  
49  
50  
51  
52  
53 Table 2).

54  
55  
56 Compared with HTN only group, unadjusted HR for combined VE risk was 0.789 and  
57  
58 0.693 for stroke risk in the both T2DM and HTN group (all  $P_s<0.0001$ ). But after  
59  
60

1  
2  
3  
4 adjustment with major cardiovascular risk factors, there was no significant reduced risk  
5  
6  
7 for both T2DM and HTN group compared with HTN only group (Table 3).

8  
9 In unadjusted model, HTN and T2DM group and HTN only group were associated with  
10  
11 the combined VE and stroke risk compared with T2DM only. After adjustment with  
12  
13 age and sex and major cardiovascular risk factors, both HTN and T2DM group and  
14  
15 HTN only group were still significantly associated with combined VE and stroke risk  
16  
17 (Table 4).  
18  
19  
20  
21

## 22 **DISCUSSION**

23  
24 In this present study, having HTN and/or T2DM was significantly associated with  
25  
26 combined VE and stroke before and after adjustment for major cardiovascular risk  
27  
28 factors compared with the non-T2DM and non-HTN group. The association of T2DM  
29  
30 with the risk of both combined VE and stroke attenuated after adjusting for major  
31  
32 cardiovascular risk factors. Besides, HTN only group was more significantly associated  
33  
34 with combined VE and stroke risk than T2DM only group.  
35  
36  
37  
38  
39

40 To our known, our study firstly investigated the combined effect of HTN and T2DM in  
41  
42 large cohorts in real world setting in Chinese patients. There are several studies  
43  
44 conducted in Finland, American and Japan investigating different impact of HTN and  
45  
46 diabetes on cardiovascular disease incidence and mortality.<sup>21-23 26</sup> HTN and/or T2DM  
47  
48 were associated with the increased risk of combined VE and stroke in this study. The  
49  
50 HR for cardiovascular disease was about 2 in the T2DM only group, which was lower  
51  
52 than 3 reported in Framingham cohort of 1952-74.<sup>11</sup> Both HTN and T2DM have been  
53  
54 shown to be the strong risk factors for cardiovascular disease mortality.<sup>3</sup>  
55  
56  
57  
58  
59  
60

1  
2  
3  
4 In unadjusted analyses and adjustment model for major cardiovascular risk factors, we  
5  
6 observed that patients with both T2DM and HTN showed increased risk of combined  
7  
8 VE and stroke compared with those only with T2DM. These results suggest that the  
9  
10 HTN conferred an enhanced risk of cardiovascular disease. Similarly, co-existence of  
11  
12 HTN and T2DM conferred increased risk of cardiovascular diseases incidence  
13  
14 compared with T2DM only adults.<sup>3 27</sup>

15  
16  
17  
18  
19  
20 After adjustment for major cardiovascular risk factors, patients with T2DM and HTN  
21  
22 were not significantly increased with the combined VE and stroke risk compared with  
23  
24 HTN only. In this study, we included patients with HTN and/or T2DM having  
25  
26 medication records. Antihypertension treatment such as angiotensin converting enzyme  
27  
28 inhibitor, calcium-channel blockers, or  $\beta$  blockers have been shown to reduce the risk  
29  
30 of cardiovascular diseases according to several randomized trials and meta-analysis  
31  
32 researches.<sup>28 29</sup> A meta-analysis study demonstrated that antihypertensive treatment  
33  
34 decreased the risk of cardiovascular disease and stroke among patients with a history  
35  
36 of cardiovascular disease without HTN.<sup>30</sup> Thus, combined T2DM and HTN did not  
37  
38 increase the risk of combined VE and stroke compared with HTN, which may be due  
39  
40 to the antihypertensive treatment in this population.

41  
42  
43  
44  
45  
46  
47  
48 Besides, we also observed that HTN only group was more associated with combined  
49  
50 VE and stroke risk than T2DM group. The results were similar with previous report  
51  
52 that HTN alone was more related with all-cause and atherosclerotic cardiovascular  
53  
54 disease than T2DM alone in community-dwelling older adults.<sup>21</sup> A study performed in  
55  
56 Iranian older adults showed that T2DM alone increased the coronary heart disease  
57  
58  
59  
60

1  
2  
3  
4 incidence, stroke incidence and the all-cause mortality compared with HTN alone .<sup>24</sup>  
5  
6

7 Thus, a prospective study was necessary to be performed for further analysis.  
8

9 The current study has several significant strengths. First, this study included large  
10 number of patients. Second, data information about cardiovascular risk factors were  
11 collected in this study. However, there were several limitations in this study. First, BMI  
12 and life style such as smoking and alcohol drinking were not accessed through EMRs.  
13  
14 Second, mortality data could not be accessed through the HIS system in hospitals.  
15  
16  
17  
18  
19  
20  
21

## 22 **CONCLUSIONS**

23  
24 In summary, HTN and/or T2DM was strongly associated with the increased risk of  
25 combined VE and stroke independent of conventional cardiovascular risk factors.  
26  
27 T2DM seems not the risk of combined VE and stroke in HTN patients after adjusting  
28 for major cardiovascular risk factors. HTN was more significantly associated with  
29 combined VE and stroke risk than T2DM. However, a prospective study investigating  
30 the impact of HTN and/or T2DM on combined VE and stroke risk is needed to be  
31 performed.  
32  
33  
34  
35  
36  
37  
38  
39  
40  
41  
42  
43  
44  
45  
46  
47  
48  
49  
50  
51  
52  
53  
54  
55  
56  
57  
58  
59  
60

---

## ACKNOWLEDGEMENTS

None

## FUNDING

The authors received no specific funding for this work.

## AUTHOR CONTRIBUTIONS

HSM and YL designed the study, analyzed the data, and wrote the first draft of the manuscript. HSM, YL, JL, and YD revised it critically for important intellectual content and approved the final version.

## DATA AVAILABILITY

All data relevant to the study were obtained from SuValue database which belongs to a third party and is not publicly available.

## COMPETING INTERESTS

None.

## ETHICS APPROVAL

All analysis was performed based on SuValue database. Authorization for SuValue database was obtained when the database was setup, so both ethics consideration and written informed patient consent were not needed for this analysis. Besides, all patients' electronic medical records (EMRs) were deidentified and anonymized when the SuValue database was constructed.

## REFERENCES

- 1 Society CD. Guidelines for the prevention and treatment of type 2 diabetes in China (2017 edition). *J Chin J Diabetes* 2018;10:4-67.
- 2 Li Y, Teng D, Shi X, *et al*. Prevalence of diabetes recorded in mainland China using 2018 diagnostic criteria from the American Diabetes Association: national cross sectional study. *BMJ (Clinical research ed)* 2020;369:m997.



- 3 Ferrannini E, Cushman WC. Diabetes and hypertension: the bad companions. *The Lancet* 2012;380(9841):601-10.
- 4 Sun D, Zhou T, Heianza Y, *et al.* Type 2 Diabetes and Hypertension. *Circ Res* 2019;124(6):930-37.
- 5 Rask-Madsen C, Li Q, Freund B, *et al.* Loss of insulin signaling in vascular endothelial cells accelerates atherosclerosis in apolipoprotein E null mice. *Cell metabolism* 2010;11(5):379-89.
- 6 Rask-Madsen C, Buonomo E, Li Q, *et al.* Hyperinsulinemia does not change atherosclerosis development in apolipoprotein E null mice. *Arteriosclerosis, thrombosis, and vascular biology* 2012;32(5):1124-31.
- 7 Sarwar N, Gao P, Seshasai SR, *et al.* Diabetes mellitus, fasting blood glucose concentration, and risk of vascular disease: a collaborative meta-analysis of 102 prospective studies. *Lancet (London, England)* 2010;375(9733):2215-22.
- 8 Huxley R, Barzi F, Woodward M. Excess risk of fatal coronary heart disease associated with diabetes in men and women: meta-analysis of 37 prospective cohort studies. *BMJ (Clinical research ed)* 2006;332(7533):73-8.
- 9 Schramm TK, Gislason GH, Køber L, *et al.* Diabetes patients requiring glucose-lowering therapy and nondiabetics with a prior myocardial infarction carry the same cardiovascular risk: a population study of 3.3 million people. *Circulation* 2008;117(15):1945-54.
- 10 Almdal T, Scharling H, Jensen JS, *et al.* The independent effect of type 2 diabetes mellitus on ischemic heart disease, stroke, and death: a population-based study of 13,000 men and women with 20 years of follow-up. *Archives of internal medicine* 2004;164(13):1422-6.
- 11 Fox CS. Cardiovascular disease risk factors, type 2 diabetes mellitus, and the Framingham Heart Study. *Trends in cardiovascular medicine* 2010;20(3):90-5.
- 12 Fox CS, Coady S, Sorlie PD, *et al.* Trends in cardiovascular complications of diabetes. *JAMA* 2004;292(20):2495-9.
- 13 Hypertension in Diabetes Study (HDS): I. Prevalence of hypertension in newly

1  
2  
3  
4 presenting type 2 diabetic patients and the association with risk factors for  
5 cardiovascular and diabetic complications. *J Hypertens* 1993;11(3):309-17.

6  
7  
8 14 Lewington S, Clarke R, Qizilbash N, *et al.* Age-specific relevance of usual blood  
9 pressure to vascular mortality: a meta-analysis of individual data for one million adults  
10 in 61 prospective studies. *Lancet (London, England)* 2002;360(9349):1903-13.

11  
12  
13 15 Britton KA, Gaziano JM, Djoussé L. Normal systolic blood pressure and risk of  
14 heart failure in US male physicians. *European journal of heart failure*  
15 2009;11(12):1129-34.

16  
17  
18 16 Lawes CM, Rodgers A, Bennett DA, *et al.* Blood pressure and cardiovascular  
19 disease in the Asia Pacific region. *J Hypertens* 2003;21(4):707-16.

20  
21  
22 17 Brown DW, Giles WH, Greenlund KJ. Blood pressure parameters and risk of fatal  
23 stroke, NHANES II mortality study. *American journal of hypertension* 2007;20(3):338-  
24 41.

25  
26  
27 18 Aronow WS, Fleg JL, Pepine CJ, *et al.* ACCF/AHA 2011 expert consensus  
28 document on hypertension in the elderly: a report of the American College of  
29 Cardiology Foundation Task Force on Clinical Expert Consensus Documents  
30 developed in collaboration with the American Academy of Neurology, American  
31 Geriatrics Society, American Society for Preventive Cardiology, American Society of  
32 Hypertension, American Society of Nephrology, Association of Black Cardiologists,  
33 and European Society of Hypertension. *Journal of the American Society of*  
34 *Hypertension : JASH* 2011;5(4):259-352.

35  
36  
37 19 Ikeda A, Iso H, Yamagishi K, *et al.* Blood pressure and the risk of stroke,  
38 cardiovascular disease, and all-cause mortality among Japanese: the JPHC Study.  
39 *American journal of hypertension* 2009;22(3):273-80.

40  
41  
42 20 Lotfaliany M, Akbarpour S, Mozafary A, *et al.* Hypertension phenotypes and  
43 incident cardiovascular disease and mortality events in a decade follow-up of a Middle  
44 East cohort. *J Hypertens* 2015;33(6):1153-61.

45  
46  
47 21 Oh JY, Allison MA, Barrett-Connor E. Different impacts of hypertension and  
48 diabetes mellitus on all-cause and cardiovascular mortality in community-dwelling  
49  
50  
51  
52  
53  
54  
55  
56  
57  
58  
59  
60

- 
- 1  
2  
3  
4 older adults: the Rancho Bernardo Study. *J Hypertens* 2017;35(1):55-62.
- 5  
6 22 Hu G, Jousilahti P, Tuomilehto J. Joint effects of history of hypertension at baseline  
7 and type 2 diabetes at baseline and during follow-up on the risk of coronary heart  
8 disease. *Eur Heart J* 2007;28(24):3059-66.
- 9  
10  
11 23 Kokubo Y, Okamura T, Watanabe M, *et al*. The combined impact of blood pressure  
12 category and glucose abnormality on the incidence of cardiovascular diseases in a  
13 Japanese urban cohort: the Suita Study. *Hypertens Res* 2010;33(12):1238-43.
- 14  
15  
16 24 Zafari N, Asgari S, Lotfaliany M, *et al*. Impact Of Hypertension versus Diabetes on  
17 Cardiovascular and All-cause Mortality in Iranian Older Adults: Results of 14 Years of  
18 Follow-up. *Sci Rep* 2017;7(1):14220.
- 19  
20  
21 25 Wang C, Gao Y, Zhu L, *et al*. Treatment Patterns in Patients With Newly Diagnosed  
22 Type 2 Diabetes in China: A Retrospective, Longitudinal Database Study. *Clinical*  
23 *therapeutics* 2019;41(8):1440-52.
- 24  
25  
26 26 Hu G, Sarti C, Jousilahti P, *et al*. The impact of history of hypertension and type 2  
27 diabetes at baseline on the incidence of stroke and stroke mortality. *Stroke*  
28 2005;36(12):2538-43.
- 29  
30  
31 27 Chen G, McAlister FA, Walker RL, *et al*. Cardiovascular outcomes in framingham  
32 participants with diabetes: the importance of blood pressure. *Hypertension*  
33 2011;57(5):891-7.
- 34  
35  
36 28 Patel A, MacMahon S, Chalmers J, *et al*. Effects of a fixed combination of  
37 perindopril and indapamide on macrovascular and microvascular outcomes in patients  
38 with type 2 diabetes mellitus (the ADVANCE trial): a randomised controlled trial.  
39 *Lancet (London, England)* 2007;370(9590):829-40.
- 40  
41  
42 29 Turnbull F, Neal B, Algert C, *et al*. Effects of different blood pressure-lowering  
43 regimens on major cardiovascular events in individuals with and without diabetes  
44 mellitus: results of prospectively designed overviews of randomized trials. *Archives of*  
45 *internal medicine* 2005;165(12):1410-9.
- 46  
47  
48 30 Thompson AM, Hu T, Eshelbrenner CL, *et al*. Antihypertensive Treatment and  
49 Secondary Prevention of Cardiovascular Disease Events Among Persons Without  
50  
51  
52  
53  
54  
55  
56  
57  
58  
59  
60

---

Hypertension: A Meta-analysis. *JAMA* 2011;305(9):913-22.

For peer review only

1  
2  
3  
4  
5  
6  
7  
8  
9  
10  
11  
12  
13  
14  
15  
16  
17  
18  
19  
20  
21  
22  
23  
24  
25  
26  
27  
28  
29  
30  
31  
32  
33  
34  
35  
36  
37  
38  
39  
40  
41  
42  
43  
44  
45  
46  
47  
48  
49  
50  
51  
52  
53  
54  
55  
56  
57  
58  
59  
60

**Table 1 Baseline characteristics of included patients.**

|                                       | <b>HTN only</b> | <b>T2DM only</b> | <b>T2DM and HTN</b> | <b>Non-T2DM and non-HTN</b> | <b>P value</b> |
|---------------------------------------|-----------------|------------------|---------------------|-----------------------------|----------------|
| <b>Total</b>                          | 9,653           | 8,012            | 3,592               | 10561                       |                |
| <b>Sex</b>                            |                 |                  |                     |                             |                |
| Male                                  | 4,419 (45.8%)   | 4,006 (50.0%)    | 1,634 (45.5%)       | 4889 (46.3%)                | -              |
| Female                                | 5,234 (54.2%)   | 4,006 (50.0%)    | 1,958 (54.5%)       | 5672 (53.7%)                | -              |
| <b>Age</b>                            |                 |                  |                     |                             |                |
| 18-29 (n, %)                          | 79 (0.8%)       | 204 (2.5%)       | 31 (0.9%)           | 1372 (13.0%)                | -              |
| 30-39 (n, %)                          | 602 (6.2%)      | 831 (10.4%)      | 139 (3.9%)          | 2439 (23.1%)                | -              |
| 40-49 (n, %)                          | 1,856 (19.2%)   | 2,323 (29.0%)    | 553 (15.4%)         | 3227 (30.6%)                | -              |
| 50-59 (n, %)                          | 1,856 (20.7%)   | 2,297 (28.7%)    | 927 (25.8%)         | 1954 (18.5%)                | -              |
| 60-69 (n, %)                          | 2,552 (26.4%)   | 1,704 (21.3%)    | 1,194 (33.2%)       | 1179 (11.2%)                | -              |
| 70-79 (n, %)                          | 1,715 (17.8%)   | 556 (6.9%)       | 573 (16.0%)         | 336 (3.2%)                  | -              |
| ≥80 (n, %)                            | 852 (8.8%)      | 97 (1.2%)        | 175 (4.9%)          | 54 (0.5%)                   | -              |
| <b>Triglyceride (mmol/L)</b>          | 1.86 (1.54)     | 2.35 (2.55)      | 2.29 (1.85)         | 1.71 (1.65)                 | <.0001         |
| <b>Total cholesterol (mmol/L)</b>     | 5.31 (1.19)     | 5.32 (1.41)      | 5.29 (1.28)         | 5.28 (1.15)                 | 0.3506         |
| <b>HDL-C (mmol/L)</b>                 | 1.41 (0.41)     | 1.25 (0.45)      | 1.26 (0.39)         | 1.40 (0.39)                 | <.0001         |
| <b>LDL-C (mmol/L)</b>                 | 3.17 (1.00)     | 3.07 (1.03)      | 3.02 (0.98)         | 3.03 (0.90)                 | <.0001         |
| <b>Serum creatinine (µmol/L)</b>      | 81.11 (39.35)   | 70.57 (23.94)    | 84.26 (59.38)       | 76.78 (20.42)               | <.0001         |
| <b>HbA1c (%)</b>                      | 5.58 (1.38)     | 9.41 (3.11)      | 8.41 (2.63)         | 5.73 (1.31)                 | <.0001         |
| <b>Fasting blood-glucose (mmol/L)</b> | 5.76 (1.28)     | 11.15 (5.28)     | 9.88 (5.14)         | 5.58 (1.13)                 | <.0001         |
| <b>Serum insulin (pmol/liter)</b>     | 95.63 (60.05)   | 117.64 (288.36)  | 78.43 (57.89)       | 9.98 (3.21)                 | 0.6502         |
| <b>Proteinuria (positive)</b>         | 310 (3.2%)      | 145 (1.8%)       | 126 (3.5%)          | 143 (1.4%)                  | <.0001         |
| <b>Diabetes complications</b>         |                 |                  |                     |                             |                |
| Diabetic nephropathy                  | -               | 450 (5.6%)       | 446 (12.4%)         | -                           | -              |
| Diabetic retinopathy                  | -               | 313 (3.9%)       | 159 (4.4%)          | -                           | -              |

|                                      |   |            |            |   |   |
|--------------------------------------|---|------------|------------|---|---|
| Diabetic neuropathy                  | - | 462 (5.8%) | 225 (6.3%) | - | - |
| Diabetic lower limb vascular disease | - | 7 (0.09%)  | 15 (0.42%) | - | - |
| Diabetic foot                        | - | 80 (1.0%)  | 61 (1.7%)  | - | - |

HTN: hypertension; T2DM: type 2 diabetes mellitus; HDL-C: high density lipoprotein cholesterol; LDL-C: low density lipoprotein cholesterol. For continuous variables, data were presented as mean (SD) and P values for four groups were calculated using ANOVA test. For categorical variables, data were presented as number (frequency) and P values for four groups were calculated using Chi-square test.

**Table 2 Association of type 2 diabetes mellitus (T2DM) and/or hypertension (HTN) with combined vascular event and stroke compared with non-T2DM and non-HTN group.**

|                              | Combined vascular event (VE) |         | Stroke               |         |
|------------------------------|------------------------------|---------|----------------------|---------|
|                              | HR (95% CI)                  | P value | HR (95% CI)          | P value |
| <b>Unadjusted</b>            |                              |         |                      |         |
| Non-T2DM and non-HTN         | 1 (reference)                |         | 1 (reference)        |         |
| T2DM only                    | 1.747 (1.566, 1.949)         | <.0001  | 2.077 (1.755, 2.459) | <.0001  |
| HTN only                     | 6.246 (5.712, 6.830)         | <.0001  | 8.642 (7.517, 9.934) | <.0001  |
| T2DM and HTN                 | 4.930 (4.93, 5.474)          | <.0001  | 5.990 (5.102, 7.032) | <.0001  |
| <b>Age- and sex-adjusted</b> |                              |         |                      |         |
| Non-T2DM and non-HTN         | 1 (reference)                |         | 1 (reference)        |         |
| T2DM only                    | 1.258 (1.127, 1.405)         | <.0001  | 1.464 (1.235, 1.735) | <.0001  |
| HTN only                     | 3.344 (3.046, 3.670)         | <.0001  | 4.409 (3.817, 5.093) | <.0001  |
| T2DM and HTN                 | 2.595 (2.329, 2.892)         | <.0001  | 3.021 (2.561, 3.563) | <.0001  |
| <b>Risk factors-adjusted</b> |                              |         |                      |         |
| Non-T2DM and non-HTN         | 1 (reference)                |         | 1 (reference)        |         |
| T2DM only                    | 1.332 (1.134, 1.565)         | 0.0005  | 1.584 (1.246, 2.014) | <.0001  |
| HTN only                     | 3.244 (2.946, 3.572)         | <.0001  | 4.543 (3.918, 5.268) | <.0001  |
| T2DM and HTN                 | 3.002 (2.577, 3.497)         | <.0001  | 4.151 (3.346, 5.149) | <.0001  |

CI, confidence interval; VE, combined vascular event; T2DM, type 2 diabetes mellitus; HR, hazard ratio; HTN, hypertension. Risk factors include age, sex, triglycerides, total cholesterol, high density lipoprotein cholesterol, low density lipoprotein cholesterol.

**Table 3 Association of type 2 diabetes mellitus (T2DM) and hypertension (HTN)****with combined vascular event and stroke compared with HTN only.**

|                              | Combined vascular event (VE) |         | Stroke               |         |
|------------------------------|------------------------------|---------|----------------------|---------|
|                              | HR (95% CI)                  | P value | HR (95% CI)          | P value |
| <b>Unadjusted</b>            |                              |         |                      |         |
| HTN only                     | 1 (reference)                |         | 1 (reference)        |         |
| T2DM and HTN                 | 0.789 (0.732, 0.851)         | <.0001  | 0.693 (0.624, 0.769) | <.0001  |
| <b>Age- and sex-adjusted</b> |                              |         |                      |         |
| HTN only                     | 1 (reference)                |         | 1 (reference)        |         |
| T2DM and HTN                 | 0.776 (0.720, 0.836)         | <.0001  | 0.685 (0.617, 0.761) | <.0001  |
| <b>Risk factors-adjusted</b> |                              |         |                      |         |
| HTN only                     | 1 (reference)                |         | 1 (reference)        |         |
| T2DM and HTN                 | 0.925 (0.814, 1.052)         | 0.2352  | 0.914 (0.771, 1.082) | 0.2959  |

CI, confidence interval; VE, combined vascular event; T2DM, type 2 diabetes mellitus;

HR, hazard ratio; HTN, hypertension. Risk factors include age, sex, triglycerides, total cholesterol, high density lipoprotein cholesterol, low density lipoprotein cholesterol.



**Table 4 Association of type 2 diabetes mellitus (T2DM) and/or hypertension (HTN) with combined vascular event and stroke compared with T2DM only.**

|                              | Combined vascular event (VE) |         | Stroke               |         |
|------------------------------|------------------------------|---------|----------------------|---------|
|                              | HR (95% CI)                  | P value | HR (95% CI)          | P value |
| <b>Unadjusted</b>            |                              |         |                      |         |
| T2DM only                    | 1 (reference)                |         | 1 (reference)        |         |
| HTN only                     | 3.575 (3.296, 3.877)         | <.0001  | 4.160 (3.701, 4.675) | <.0001  |
| T2DM and HTN                 | 2.821 (2.558, 3.112)         | <.0001  | 2.883 (2.504, 3.321) | <.0001  |
| <b>Age- and sex-adjusted</b> |                              |         |                      |         |
| T2DM only                    | 1 (reference)                |         | 1 (reference)        |         |
| HTN only                     | 2.657 (2.447, 2.885)         | <.0001  | 3.011 (2.676, 3.389) | <.0001  |
| T2DM and HTN                 | 2.062 (1.868, 2.276)         | <.0001  | 2.063 (1.789, 2.379) | <.0001  |
| <b>Risk factors-adjusted</b> |                              |         |                      |         |
| T2DM only                    | 1 (reference)                |         | 1 (reference)        |         |
| HTN only                     | 2.435 (2.113, 2.805)         | <.0001  | 2.868 (2.341, 3.513) | <.0001  |
| T2DM and HTN                 | 2.253 (1.876, 2.706)         | <.0001  | 2.620 (2.031, 3.380) | <.0001  |

CI, confidence interval; VE, combined vascular event; T2DM, type 2 diabetes mellitus;

HR, hazard ratio; HTN, hypertension. Risk factors include age, sex, triglycerides, total cholesterol, high density lipoprotein cholesterol, low density lipoprotein cholesterol.

---

**Figure legends**

Figure 1 Kaplan-Meier survival curve of combined vascular event (A) and stroke (B) among different groups. HTN: hypertension, T2DM: type 2 diabetes mellitus.

For peer review only

A

1  
2  
3  
4  
5  
6  
7  
8  
9  
10  
11  
12  
13  
14  
15  
16  
17  
18  
19  
20  
21  
22  
23  
24  
25  
26  
27  
28  
29  
30  
31  
32  
33  
34  
35  
36  
37  
38  
39  
40  
41  
42  
43  
44  
45  
46  
47  
48  
49  
50  
51  
52  
53  
54  
55  
56  
57  
58  
59  
60

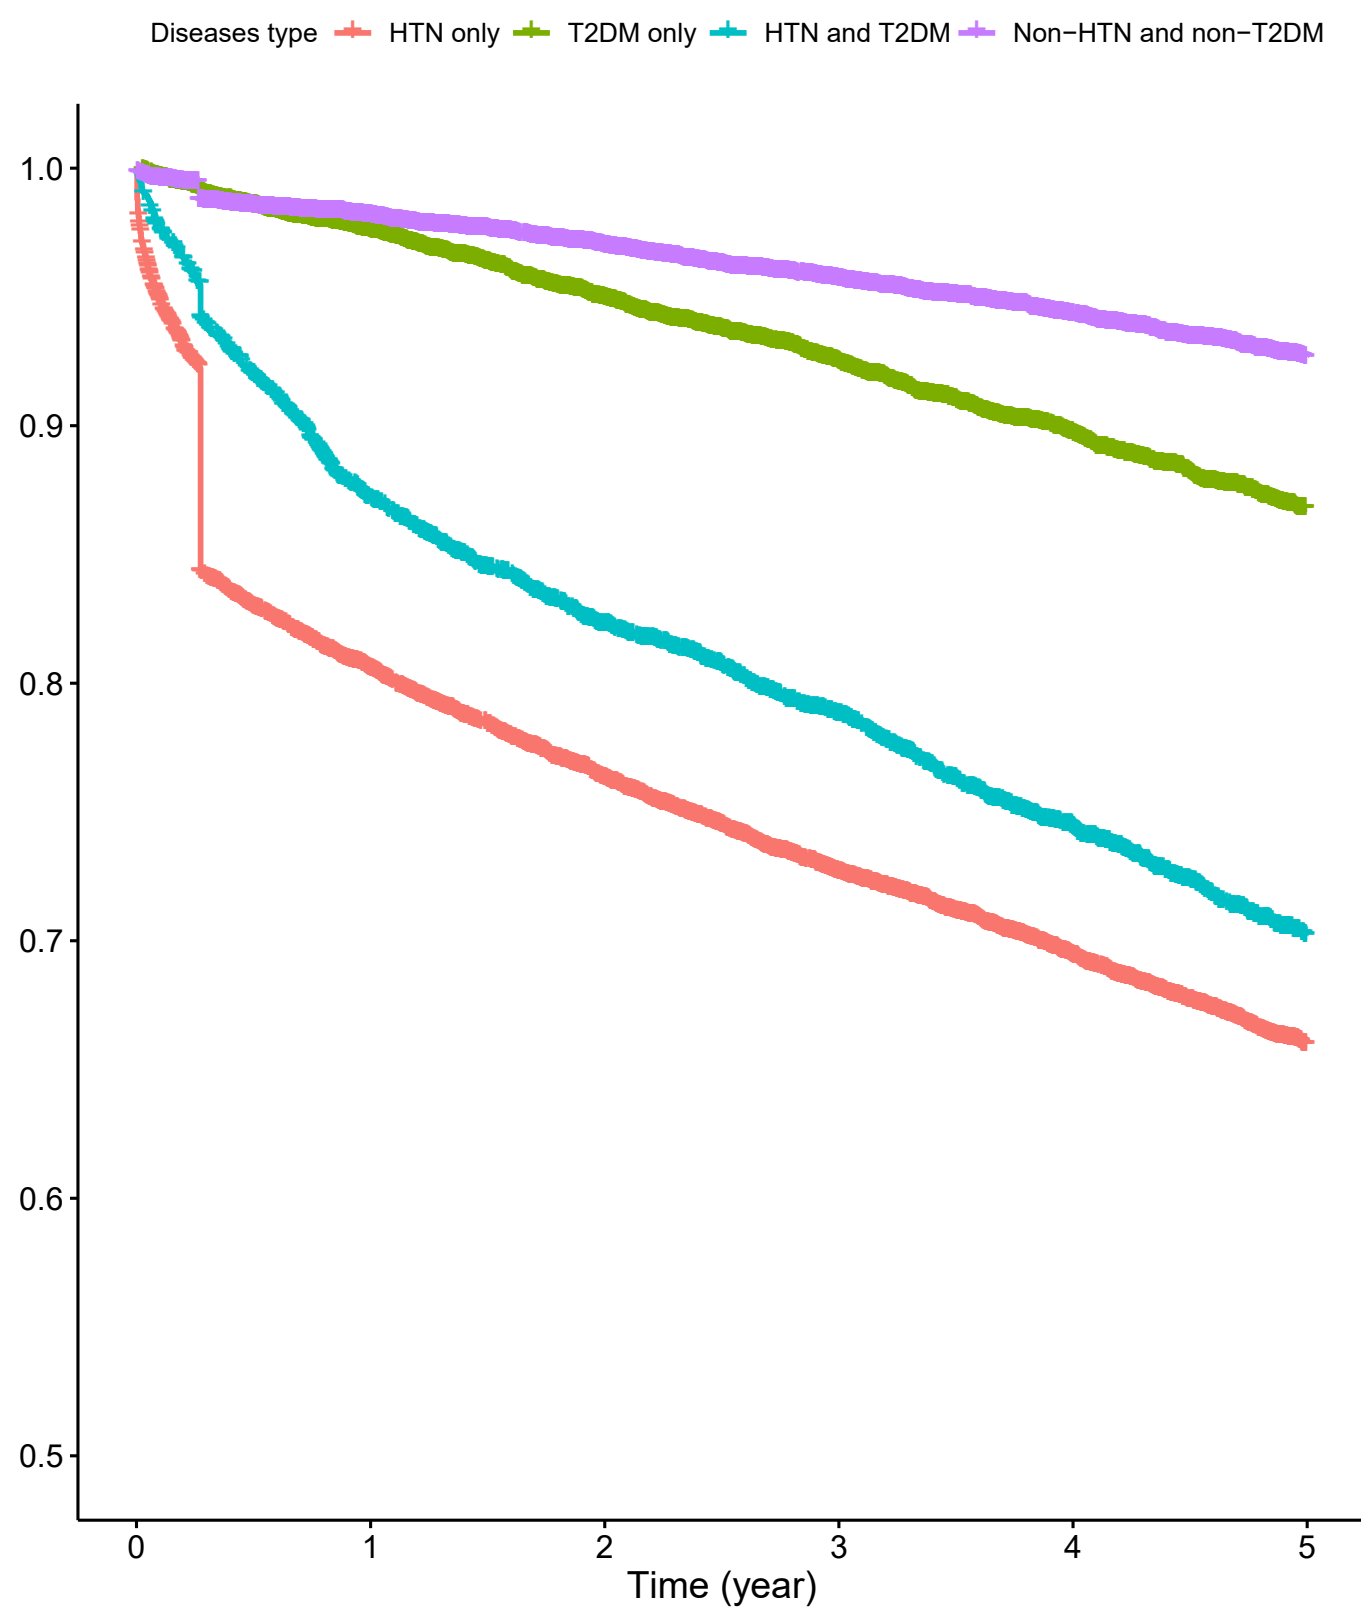

Number at risk

| Diseases type        | 0     | 1    | 2    | 3    | 4    | 5    |
|----------------------|-------|------|------|------|------|------|
| HTN only             | 9653  | 7303 | 6381 | 5463 | 4416 | 3215 |
| T2DM only            | 8012  | 7010 | 5871 | 4742 | 3512 | 2202 |
| HTN and T2DM         | 3592  | 2934 | 2472 | 2082 | 1645 | 1086 |
| Non-HTN and non-T2DM | 10561 | 9233 | 7876 | 6918 | 5808 | 4086 |

B

Free from stroke

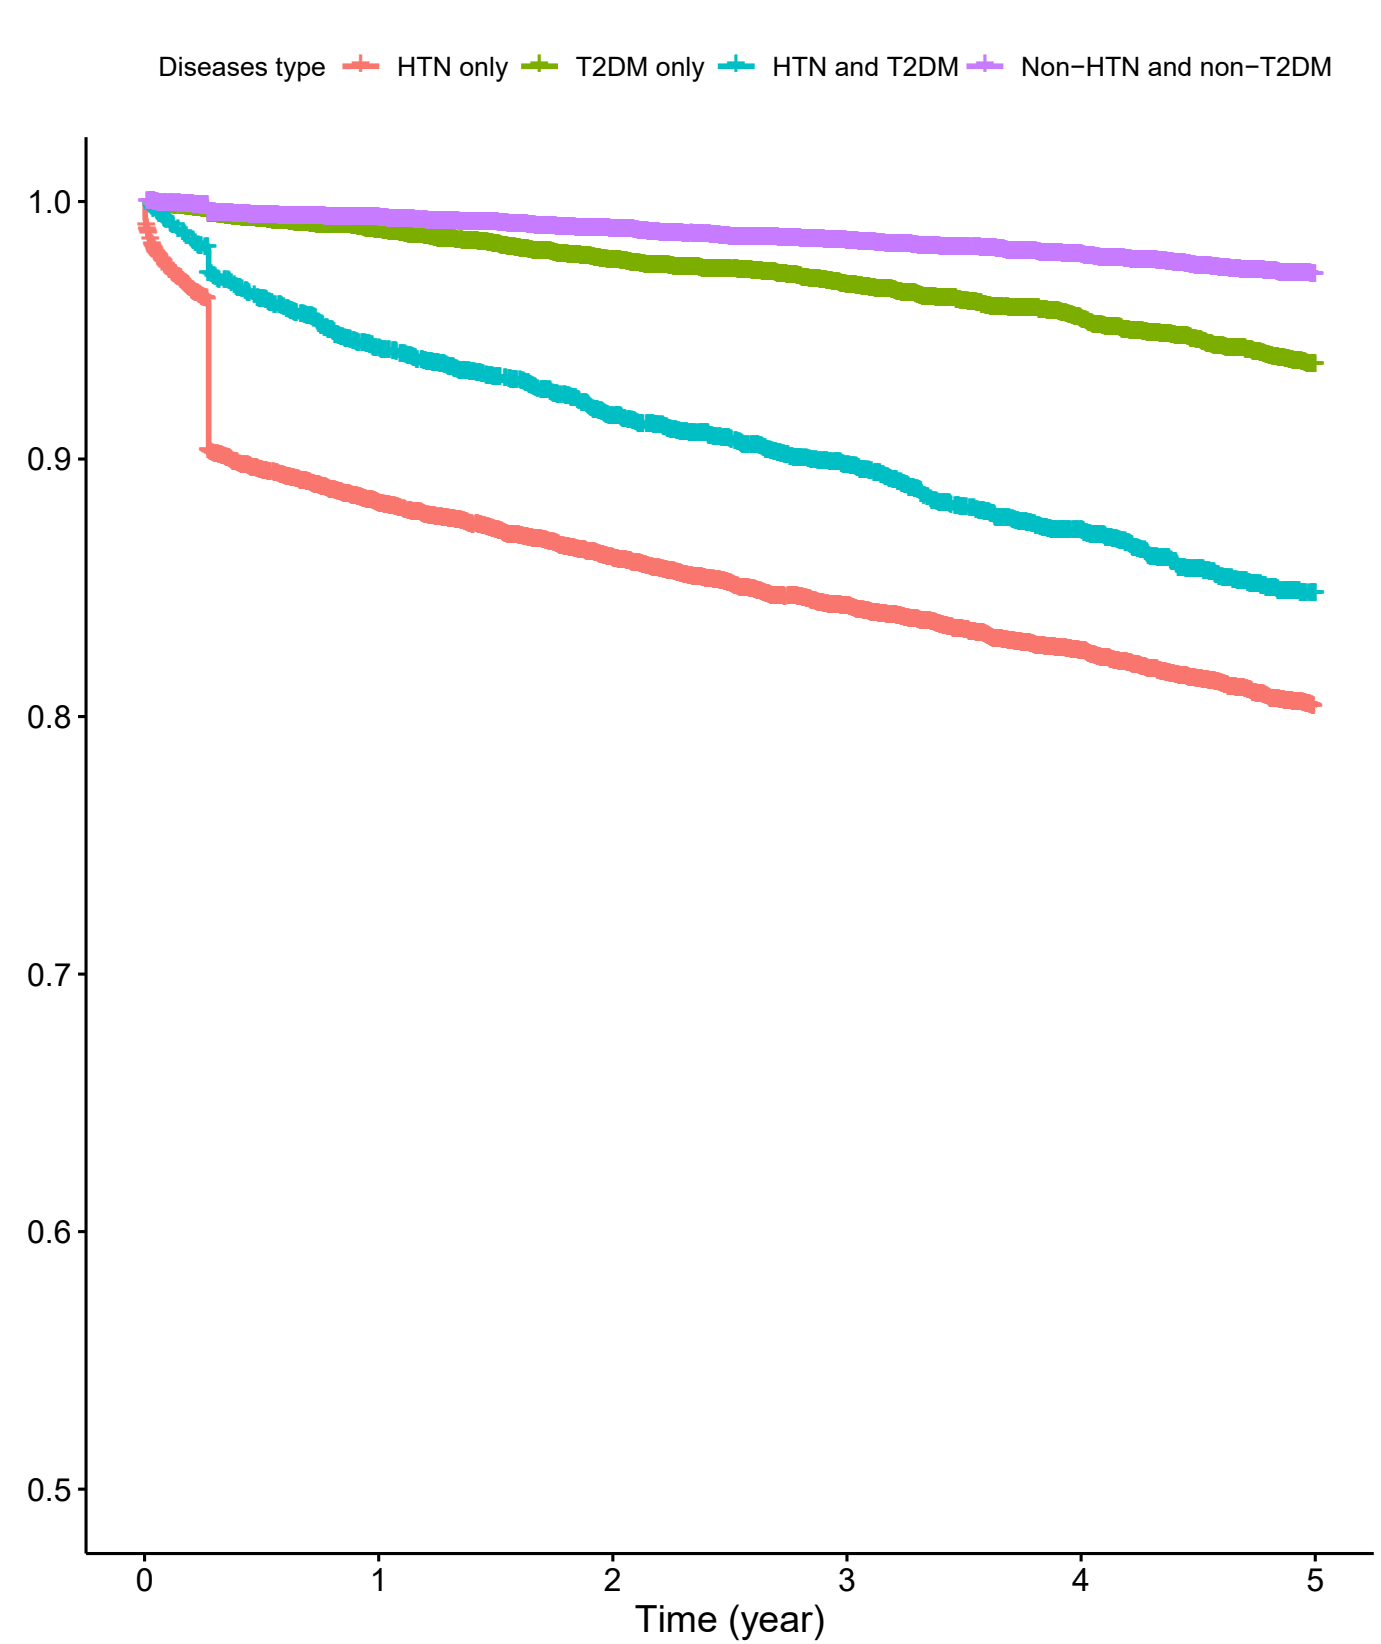

Number at risk

| Diseases type        | 0     | 1    | 2    | 3    | 4    | 5    |
|----------------------|-------|------|------|------|------|------|
| HTN only             | 9653  | 7809 | 7004 | 6150 | 5062 | 3760 |
| T2DM only            | 8012  | 7093 | 6023 | 4945 | 3702 | 2339 |
| HTN and T2DM         | 3592  | 3156 | 2719 | 2333 | 1876 | 1238 |
| Non-HTN and non-T2DM | 10561 | 9314 | 8001 | 7084 | 5998 | 4266 |

STROBE Statement—Checklist of items that should be included in reports of *cross-sectional studies*

|                              | Item No | Recommendation                                                                                                                                                                                               | Page No |
|------------------------------|---------|--------------------------------------------------------------------------------------------------------------------------------------------------------------------------------------------------------------|---------|
| <b>Title and abstract</b>    | 1       | (a) Indicate the study's design with a commonly used term in the title or the abstract                                                                                                                       | 1, 2    |
|                              |         | (b) Provide in the abstract an informative and balanced summary of what was done and what was found                                                                                                          | 2       |
| <b>Introduction</b>          |         |                                                                                                                                                                                                              |         |
| Background/rationale         | 2       | Explain the scientific background and rationale for the investigation being reported                                                                                                                         | 4, 5    |
| Objectives                   | 3       | State specific objectives, including any prespecified hypotheses                                                                                                                                             | 5       |
| <b>Methods</b>               |         |                                                                                                                                                                                                              |         |
| Study design                 | 4       | Present key elements of study design early in the paper                                                                                                                                                      | 5       |
| Setting                      | 5       | Describe the setting, locations, and relevant dates, including periods of recruitment, exposure, follow-up, and data collection                                                                              | 5, 6    |
| Participants                 | 6       | (a) Give the eligibility criteria, and the sources and methods of selection of participants                                                                                                                  | 5, 6    |
| Variables                    | 7       | Clearly define all outcomes, exposures, predictors, potential confounders, and effect modifiers. Give diagnostic criteria, if applicable                                                                     | 6       |
| Data sources/<br>measurement | 8*      | For each variable of interest, give sources of data and details of methods of assessment (measurement). Describe comparability of assessment methods if there is more than one group                         | 5, 6    |
| Bias                         | 9       | Describe any efforts to address potential sources of bias                                                                                                                                                    | 5, 6    |
| Study size                   | 10      | Explain how the study size was arrived at                                                                                                                                                                    | 7       |
| Quantitative variables       | 11      | Explain how quantitative variables were handled in the analyses. If applicable, describe which groupings were chosen and why                                                                                 | 5, 6    |
| Statistical methods          | 12      | (a) Describe all statistical methods, including those used to control for confounding                                                                                                                        | 6, 7    |
|                              |         | (b) Describe any methods used to examine subgroups and interactions                                                                                                                                          | NA      |
|                              |         | (c) Explain how missing data were addressed                                                                                                                                                                  | NA      |
|                              |         | (d) If applicable, describe analytical methods taking account of sampling strategy                                                                                                                           | NA      |
|                              |         | (e) Describe any sensitivity analyses                                                                                                                                                                        | NA      |
| <b>Results</b>               |         |                                                                                                                                                                                                              |         |
| Participants                 | 13*     | (a) Report numbers of individuals at each stage of study—eg numbers potentially eligible, examined for eligibility, confirmed eligible, included in the study, completing follow-up, and analysed            | 7       |
|                              |         | (b) Give reasons for non-participation at each stage                                                                                                                                                         | NA      |
|                              |         | (c) Consider use of a flow diagram                                                                                                                                                                           | NA      |
| Descriptive data             | 14*     | (a) Give characteristics of study participants (eg demographic, clinical, social) and information on exposures and potential confounders                                                                     | 7, 8    |
|                              |         | (b) Indicate number of participants with missing data for each variable of interest                                                                                                                          | 7, 8    |
| Outcome data                 | 15*     | Report numbers of outcome events or summary measures                                                                                                                                                         | 7, 8    |
| Main results                 | 16      | (a) Give unadjusted estimates and, if applicable, confounder-adjusted estimates and their precision (eg, 95% confidence interval). Make clear which confounders were adjusted for and why they were included | 7, 8    |

|                          |    |                                                                                                                                                                            |       |
|--------------------------|----|----------------------------------------------------------------------------------------------------------------------------------------------------------------------------|-------|
|                          |    | (b) Report category boundaries when continuous variables were categorized                                                                                                  | 7, 8  |
|                          |    | (c) If relevant, consider translating estimates of relative risk into absolute risk for a meaningful time period                                                           | NA    |
| Other analyses           | 17 | Report other analyses done—eg analyses of subgroups and interactions, and sensitivity analyses                                                                             | NA    |
| <b>Discussion</b>        |    |                                                                                                                                                                            |       |
| Key results              | 18 | Summarise key results with reference to study objectives                                                                                                                   | 9, 10 |
| Limitations              | 19 | Discuss limitations of the study, taking into account sources of potential bias or imprecision. Discuss both direction and magnitude of any potential bias                 | 10    |
| Interpretation           | 20 | Give a cautious overall interpretation of results considering objectives, limitations, multiplicity of analyses, results from similar studies, and other relevant evidence | 9, 10 |
| Generalisability         | 21 | Discuss the generalisability (external validity) of the study results                                                                                                      | 9, 10 |
| <b>Other information</b> |    |                                                                                                                                                                            |       |
| Funding                  | 22 | Give the source of funding and the role of the funders for the present study and, if applicable, for the original study on which the present article is based              | 11    |

\*Give information separately for exposed and unexposed groups.

**Note:** An Explanation and Elaboration article discusses each checklist item and gives methodological background and published examples of transparent reporting. The STROBE checklist is best used in conjunction with this article (freely available on the Web sites of PLoS Medicine at <http://www.plosmedicine.org/>, Annals of Internal Medicine at <http://www.annals.org/>, and Epidemiology at <http://www.epidem.com/>). Information on the STROBE Initiative is available at [www.strobe-statement.org](http://www.strobe-statement.org).

# BMJ Open

## Impacts of type 2 diabetes mellitus and hypertension on the incidence of cardiovascular diseases and stroke in China real-world setting: A retrospective cohort study

|                                 |                                                                                                                                                                                                                                                                                                                                 |
|---------------------------------|---------------------------------------------------------------------------------------------------------------------------------------------------------------------------------------------------------------------------------------------------------------------------------------------------------------------------------|
| Journal:                        | <i>BMJ Open</i>                                                                                                                                                                                                                                                                                                                 |
| Manuscript ID                   | bmjopen-2021-053698.R2                                                                                                                                                                                                                                                                                                          |
| Article Type:                   | Original research                                                                                                                                                                                                                                                                                                               |
| Date Submitted by the Author:   | 05-Nov-2021                                                                                                                                                                                                                                                                                                                     |
| Complete List of Authors:       | Liu, Yan; The Third People's Hospital of Datong, Department of Endocrinology<br>Li, Jie; The Third People's Hospital of Datong, Department of Endocrinology<br>Dou, Ying; Ashermed Pharmaceutical Technology Co., Ltd., Department of Medicine<br>Ma, Hongshan; The Third People's Hospital of Datong, Department of Cardiology |
| <b>Primary Subject Heading</b>: | Diabetes and endocrinology                                                                                                                                                                                                                                                                                                      |
| Secondary Subject Heading:      | Public health                                                                                                                                                                                                                                                                                                                   |
| Keywords:                       | Hypertension < CARDIOLOGY, Stroke < NEUROLOGY, DIABETES & ENDOCRINOLOGY                                                                                                                                                                                                                                                         |
|                                 |                                                                                                                                                                                                                                                                                                                                 |

SCHOLARONE™  
Manuscripts



I, the Submitting Author has the right to grant and does grant on behalf of all authors of the Work (as defined in the below author licence), an exclusive licence and/or a non-exclusive licence for contributions from authors who are: i) UK Crown employees; ii) where BMJ has agreed a CC-BY licence shall apply, and/or iii) in accordance with the terms applicable for US Federal Government officers or employees acting as part of their official duties; on a worldwide, perpetual, irrevocable, royalty-free basis to BMJ Publishing Group Ltd ("BMJ") its licensees and where the relevant Journal is co-owned by BMJ to the co-owners of the Journal, to publish the Work in this journal and any other BMJ products and to exploit all rights, as set out in our [licence](#).

The Submitting Author accepts and understands that any supply made under these terms is made by BMJ to the Submitting Author unless you are acting as an employee on behalf of your employer or a postgraduate student of an affiliated institution which is paying any applicable article publishing charge ("APC") for Open Access articles. Where the Submitting Author wishes to make the Work available on an Open Access basis (and intends to pay the relevant APC), the terms of reuse of such Open Access shall be governed by a Creative Commons licence – details of these licences and which [Creative Commons](#) licence will apply to this Work are set out in our licence referred to above.

Other than as permitted in any relevant BMJ Author's Self Archiving Policies, I confirm this Work has not been accepted for publication elsewhere, is not being considered for publication elsewhere and does not duplicate material already published. I confirm all authors consent to publication of this Work and authorise the granting of this licence.

---

**Impacts of type 2 diabetes mellitus and hypertension on the incidence of cardiovascular diseases and stroke in China real-world setting: A retrospective cohort study**

Yan Liu<sup>1</sup>, Jie Li<sup>1</sup>, Ying Dou<sup>2</sup>, Hongshan Ma<sup>3,\*</sup>

<sup>1</sup>Department of Endocrinology, The Third People's Hospital of Datong, Datong 037008, China.

<sup>2</sup>Department of Medicine, Ashermed Pharmaceutical Technology Co., Ltd., Shanghai 200030, China.

<sup>3</sup>Department of Cardiology, The Third People's Hospital of Datong, Datong 037008, China.

\*Corresponding author

Hongshan Ma, Department of Cardiology, The Third People's Hospital of Datong, Datong 037008, China. Tel: +86-13681971726, Email: mahongshannew@163.com.

**Short title:** Impacts of T2DM and HTN on combined VE and stroke risk



---

## ABSTRACT

**Objective** The prevalence of type 2 diabetes mellitus (T2DM) and hypertension (HTN) has notably increased in recent years. However, there is little evidence from large-scale studies assessing the joint effect of T2DM and HTN on the risk of cardiovascular events in China. This study was performed to investigate the association of T2DM and HTN with the incidence of combined vascular events (VEs) and stroke in China.

**Design** A retrospective cohort study.

**Setting** Data were collected from the SuValue database which includes the electronic medical records of >90 million patients from 161 hospitals across 18 provinces in China.

**Participants** Patients aged  $\geq 18$  with a diagnosis of T2DM and/or HTN were included. Non-T2DM and non-HTN patients were included in this study as controls.

**Outcomes** Incidence of combined VEs and stroke during the study.

**Results** In the current study, 8,012 patients with T2DM, 9,653 patients with HTN, 3,592 patients with both T2DM and HTN, and 10,561 patients without T2DM or HTN were included. T2DM was significantly associated with combined VE and stroke risk (hazard ratio 1.332, 95% CI 1.134-1.565 and HR 1.584, 95% CI 1.246-2.014, respectively). HTN was significantly associated with combined VE and stroke risk (HR 3.244, 95% CI 2.946-3.572 and HR 4.543, 95% CI 3.918-5.268, respectively). T2DM combined with HTN was significantly associated with combined VE and stroke risk (HR 3.002, 95% CI 2.577-3.497 and HR 4.151, 95% CI 3.346-5.149, respectively). HTN was associated with a higher combined VE and stroke risk than T2DM (HR 2.435, 95% CI 2.113-2.805 and HR 2.868, 95% CI 2.341-3.513, respectively).

---

**Conclusion** T2DM and HTN were strongly associated with combined VE and stroke risk; however, the HTN-only group had a higher combined VE and stroke risk than the T2DM-only group.

**Keywords:** type 2 diabetes mellitus, hypertension, cardiovascular events, stroke, vascular events

### **Strengths and limitations of this study**

- This study was designed to analyse the electronic medical records of patients in a real-world setting.
- Cardiovascular risk factors were collected in this study.
- BMI and lifestyle factors, such as smoking and alcohol consumption, were not recorded in the electronic medical records of patients.
- Mortality data were not accessible through the electronic medical records of patients.

---

## INTRODUCTION

The prevalence of type 2 diabetes mellitus (T2DM) increased to 10.4% in 2013 and 11.2% in 2015 from 0.67% in 1980 in China.<sup>1 2</sup> Hypertension (HTN) is found in over two-thirds of patients with diabetes.<sup>3 4</sup> The development of HTN coincides with the development of hyperglycaemia.<sup>3</sup> Insulin resistance and hyperinsulinaemia might promote atherogenesis, thereby affecting blood pressure homeostasis.<sup>5 6</sup>

Diabetes has been reported to be a strong risk factor for cardiovascular disease, all-cause mortality, coronary heart disease, ischemic heart disease and stroke in many studies.<sup>7-11</sup> According to the Framingham Heart Study, adults with diabetes had an absolute 2-fold increased risk of cardiovascular disease compared with subjects without diabetes.<sup>12</sup> The total cardiovascular disease burden in diabetes patients has increased throughout the past four decades.<sup>3</sup> A cross-sectional study showed that HTN was common in patients with newly diagnosed diabetes, and HTN patients had a higher prevalence of cardiovascular events than normotensive subjects before the diagnosis of diabetes.<sup>13</sup> Hypertension has also been reported to be one of the strongest risk factors for cardiovascular disease, including coronary disease, vascular heart disease, and cerebral stroke.<sup>14-20</sup> Adults with coexistent diabetes and HTN dramatically increased the risk of cardiovascular disease by two to four times compared to adults without HTN or diabetes.<sup>3</sup> Thus, diabetes and HTN are thought to be poor companions, and blood pressure control is critical in diabetes patients with HTN. In addition, a study demonstrated that HTN had a stronger association with atherosclerotic cardiovascular disease than diabetes.<sup>21</sup>

1  
2  
3  
4 The effects of hypertension and diabetes on the risk of cardiovascular disease have been  
5 investigated in American, Finnish, Japanese and Iranian populations.<sup>21-24</sup> However,  
6 there is little evidence from large-scale studies assessing the joint effect of HTN and  
7 diabetes on the risk of cardiovascular events in China. The purpose of the study was to  
8 evaluate the impact of HTN and T2DM on the risk of cardiovascular disease and stroke  
9 in Chinese adults using the SuValue database.  
10  
11  
12  
13  
14  
15  
16  
17  
18

## 19 **METHODS**

### 20 **Study Design**

21  
22 The SuValue database is a big-data hospital information system (HIS) database that  
23 includes data on >90 million patients from 161 hospitals across 18 provinces in China.<sup>25</sup>  
24  
25  
26  
27

28 This was a retrospective cohort study designed to evaluate the risk of cardiovascular  
29 diseases and stroke in patients with T2DM and/or HTN from 2004 to 2015 in a real-  
30 world Chinese setting. Patients were included if they met the following criteria: (1)  
31 aged  $\geq 18$ ; (2) newly diagnosed T2DM and/or HTN; (3) had baseline examination  
32 records before or within 3 months at the first diagnosis (details of baseline examination  
33 were described in the Baseline Parameters section); and (4) electronic medical records  
34 (EMRs) could be found one year later after the first diagnosis of T2DM and/or HTN.  
35  
36  
37  
38  
39  
40  
41  
42  
43  
44  
45  
46  
47

48 Patients were excluded as follows: missing sex information; had been diagnosed with  
49 stroke, myocardial infarction, coronary heart disease, heart failure; had received  
50 coronary artery bypass grafting or percutaneous coronary intervention before the first  
51 diagnosis of T2DM and/or HTN; and had abnormal kidney function (normal range for  
52 serum creatinine: 54-106  $\mu\text{mol/L}$  for men; 44-97  $\mu\text{mol/L}$  for women). We also included  
53  
54  
55  
56  
57  
58  
59  
60

1  
2  
3  
4 non-T2DM and non-HTN patients who underwent the baseline examination but were  
5  
6 not from the obstetrics and gynaecology department, cancer department, neurology  
7  
8 department or cardiology department. Authorization for the SuValue database was  
9  
10 obtained when the database was set up, so neither ethics review nor written informed  
11  
12 patient consent were needed for this analysis. In addition, all patients' EMRs were  
13  
14 deidentified and anonymized when the SuValue database was constructed.  
15  
16  
17  
18  
19

### 20 **Baseline Parameters**

21  
22 Sex, age, triglyceride, total cholesterol, high-density lipoprotein cholesterol (HDL-C),  
23  
24 low-density lipoprotein cholesterol (LDL-C), serum creatinine, fasting blood glucose,  
25  
26 serum insulin, proteinuria, and medication (antidiabetics and antihypertensive  
27  
28 medications) at baseline were captured from EMRs before or within 3 months of the  
29  
30 first diagnosis of T2DM and/or HTN.  
31  
32  
33  
34

### 35 **Outcomes**

36  
37 We examined two outcomes of interest: combined vascular events (VEs) and stroke.  
38  
39 Combined VEs include stroke, myocardial infarction, coronary heart disease, heart  
40  
41 failure and coronary bypass, and percutaneous coronary intervention. The outcomes  
42  
43 were defined as the first event or last record before December 31, 2019 among the  
44  
45 event-free cases according to the diagnosis in the patients' EMRs.  
46  
47  
48  
49

### 50 **Statistical Analyses**

51  
52 Categorical variables were described using frequencies and percentages. Continuous  
53  
54 variables were described using the mean (SD) if normally distributed or as the median  
55  
56 interquartile range if not. Baseline characteristics were compared using ANOVA or chi-  
57  
58  
59  
60

1  
2  
3  
4 square tests. Kaplan–Meier survival analysis of the incidence of combined VEs and  
5  
6 stroke according to the presence of T2DM and/or HTN was performed. A Cox  
7  
8 proportional hazards model was used to assess the association between diseases and  
9  
10 each outcome, which was adjusted for cardiovascular risk factors, including sex, age,  
11  
12 triglycerides, total cholesterol, HDL-C and LDL-C. Unadjusted, sex- and age-adjusted  
13  
14 and cardiovascular risk factor-adjusted hazard ratios were calculated. A  $P < 0.05$  (two-  
15  
16 sided) was considered statistically significant. All statistical analyses were performed  
17  
18 using SAS 9.4 (SAS Institute, Cary, NC, USA).  
19  
20  
21  
22  
23

### 24 25 **Public and Patient involvement**

26  
27 Neither patients nor the public were involved in the design, conduct, reporting, or  
28  
29 dissemination plans of this research.  
30  
31

### 32 33 **RESULTS**

34  
35 In the current study, 8,012 patients with T2DM-only, 9,653 patients with HTN-only  
36  
37 and 3,592 patients with both T2DM and HTN and 10,561 patients without T2DM or  
38  
39 HTN were selected from the SuValue database. The median follow-up duration was 4.1  
40  
41 (2.4, 4.9) years. The general characteristics of the study population at baseline are  
42  
43 presented in Table 1. Comparing baseline characteristics between the four groups  
44  
45 revealed significant differences, except in total cholesterol ( $P=0.3506$ ) and serum  
46  
47 insulin ( $p=0.6502$ ).  
48  
49  
50

51  
52 Kaplan–Meier analyses demonstrated increased combined VE and stroke risk in the  
53  
54 HTN group (Fig. 1). In the unadjusted models, compared with non-HTN and non-  
55  
56 T2DM, T2DM had an HR of 1.747 for combined VEs [95% confidence interval (CI)  
57  
58  
59  
60

---

1.566-1.949,  $P<0.0001$ ] and 2.077 for stroke (95% CI 1.755-2.459,  $P<0.0001$ ). Further adjustment with age and sex and then with cardiovascular risk factors attenuated the association of T2DM with combined VE and stroke risk (HR 1.332, 95% CI 1.134-1.565 and HR 1.584, 95% CI 1.246-2.014, respectively;  $P<0.001$ , Table 2).

Kaplan–Meier analyses demonstrated an increased combined VE and stroke risk in the HTN group (Fig. 1). The HTN-only group had a more than 6-fold increased risk of combined VE (95% CI 5.712-6.830) and a more than 8-fold increased risk of stroke (95% CI 7.517-9.934) in unadjusted models (all  $P_s<0.0001$ ). These associations were attenuated but still significant after adjustment for age and sex and then for other major cardiovascular risk factors for both combined VE and stroke risk (HR 3.244, 95% CI 2.946-3.572 and HR 4.543, 95% CI 3.918-5.268, respectively; all  $P_s<0.0001$ , Table 2).

Kaplan–Meier analyses demonstrated increased combined VE and stroke risk in the HTN and T2DM groups (Fig. 1). For combined VEs, the HR of the HTN and T2DM group was 4.93 (95% CI 4.93-5.474). The HTN and T2DM groups had an increased risk of stroke to 5.990 (95% CI 5.102-7.032) in the unadjusted models (all  $P_s<0.0001$ ). These associations were attenuated but still significant after adjustment for age and sex and then other major cardiovascular risk factors for both combined VE risk and stroke risk (HR 3.002, 95% CI 2.577-3.497 and HR 4.151, 95% CI 3.346-5.149, respectively; all  $P_s<0.0001$ , Table 2).

Compared with the HTN-only group, the unadjusted HRs for combined VE risk were 0.789 and 0.693 for stroke risk in both the T2DM and HTN groups (all  $P_s<0.0001$ ). However, after adjustment for major cardiovascular risk factors, there was no

1  
2  
3  
4 significantly reduced risk for either the T2DM or HTN group compared with the HTN-  
5 only group (Table 3).  
6  
7

8  
9 In the unadjusted model, the HTN and T2DM group and the HTN-only group had a  
10 higher combined VE and stroke risk than the T2DM-only group. After adjustment for  
11 age and sex and major cardiovascular risk factors, both the HTN and T2DM groups and  
12 the HTN-only group were still significantly associated with combined VE and stroke  
13 risk (Table 4).  
14  
15  
16  
17  
18  
19  
20  
21

## 22 **DISCUSSION**

23  
24 In the present study, having HTN and/or T2DM was significantly associated with  
25 combined VE and stroke before and after adjustment for major cardiovascular risk  
26 factors compared with the non-T2DM and non-HTN. The association of T2DM with  
27 the risk of both combined VE and stroke attenuated after adjusting for major  
28 cardiovascular risk factors. In addition, the HTN-only group had a higher combined VE  
29 and stroke risk than the T2DM-only group.  
30  
31  
32  
33  
34  
35  
36  
37  
38  
39

40 To our knowledge, our study is the first to investigate the combined effect of HTN and  
41 T2DM in a large cohort in a real-world setting in Chinese patients. Several studies  
42 investigating the different impacts of HTN and diabetes on cardiovascular disease  
43 incidence and mortality have been conducted in Finland, America and Japan.<sup>21-23 26</sup>  
44  
45 HTN and/or T2DM were associated with an increased risk of combined VE and stroke  
46 in this study. The HR for cardiovascular disease was approximately 2 in the T2DM-  
47 only group, which was lower than the 3 reported in the Framingham cohort of 1952-  
48 74.<sup>11</sup> Both HTN and T2DM have been shown to be strong risk factors for cardiovascular  
49  
50  
51  
52  
53  
54  
55  
56  
57  
58  
59  
60



---

disease mortality.<sup>3</sup>

In unadjusted analyses and adjustment models for major cardiovascular risk factors, we observed that patients with both T2DM and HTN showed an increased risk of combined VE and stroke compared with those with T2DM alone. These results suggest that HTN confers an enhanced risk of cardiovascular disease. Similarly, the coexistence of HTN and T2DM conferred an increased risk of cardiovascular disease incidence compared with T2DM-only.<sup>3 27</sup>

After adjustment for major cardiovascular risk factors, patients with T2DM and HTN did not have a significantly increased combined VE and stroke risk compared with patients with HTN-only. In this study, we included patients with HTN and/or T2DM who had medication records. Antihypertension treatment, such as angiotensin converting enzyme inhibitors, calcium-channel blockers, or  $\beta$  blockers, has been shown to reduce the risk of cardiovascular diseases according to several randomized trials and meta-analysis studies.<sup>28 29</sup> A meta-analysis demonstrated that antihypertensive treatment decreased the risk of cardiovascular disease and stroke among patients with a history of cardiovascular disease without HTN.<sup>30</sup> Thus, combined T2DM and HTN did not increase the risk of combined VE and stroke compared with HTN, which may be due to the antihypertensive treatment in this population.

In addition, we also observed that the HTN-only group was more associated with combined VE and stroke risk than the T2DM group. The results were similar to a previous report that HTN alone was more related to all-cause and atherosclerotic cardiovascular disease than T2DM alone in community-dwelling older adults.<sup>21</sup> A

1  
2  
3  
4 study performed in older Iranian adults showed that T2DM alone increased the  
5  
6 coronary heart disease incidence, stroke incidence and all-cause mortality compared  
7  
8 with HTN alone.<sup>24</sup> Thus, a prospective study is necessary for further analysis.  
9  
10

11  
12 The current study has several significant strengths. First, this study included a large  
13  
14 number of patients. Second, data about cardiovascular risk factors were collected in this  
15  
16 study. However, there were several limitations in this study. First, BMI and lifestyle  
17  
18 factors, such as smoking and alcohol consumption, were not recorded in the EMRs.  
19  
20 Second, mortality data could not be accessed through the HIS system of hospitals.  
21  
22  
23

## 24 25 **CONCLUSIONS**

26  
27 In summary, HTN and/or T2DM was strongly associated with an increased risk of  
28  
29 combined VE and stroke independent of conventional cardiovascular risk factors.  
30  
31 T2DM does not seem to be a risk factor for combined VE and stroke in HTN patients  
32  
33 after adjusting for major cardiovascular risk factors. HTN had a significantly higher  
34  
35 combined VE and stroke risk than T2DM. However, a prospective study investigating  
36  
37 the impact of HTN and/or T2DM on combined VE and stroke risk needs to be  
38  
39 performed.  
40  
41  
42  
43  
44  
45  
46  
47  
48  
49  
50  
51  
52  
53  
54  
55  
56  
57  
58  
59  
60

---

## ACKNOWLEDGEMENTS

None

## FUNDING

The authors received no specific funding for this work.

## AUTHOR CONTRIBUTIONS

HSM and YL designed the study, analysed the data, and wrote the first draft of the manuscript. HSM, YL, JL, and YD revised it critically for important intellectual content and approved the final version.

## DATA AVAILABILITY

All data relevant to the study were obtained from the SuValue database, which belongs to a third party and is not publicly available.

## COMPETING INTERESTS

None.

## ETHICS APPROVAL

All analyses were performed based on the SuValue database. Authorization for the SuValue database was obtained when the database was set up, so neither ethics review or written informed patient consent were needed for this analysis. In addition, all patients' electronic medical records (EMRs) were deidentified and anonymized when the SuValue database was constructed.

---

## References

- 1 Society CD. Guidelines for the prevention and treatment of type 2 diabetes in China (2017 edition). *J Chin J Diabetes* 2018;10:4-67.
- 2 Li Y, Teng D, Shi X, *et al.* Prevalence of diabetes recorded in mainland China using 2018 diagnostic criteria from the American Diabetes Association: national cross sectional study. *BMJ (Clinical research ed)* 2020;369:m997.
- 3 Ferrannini E, Cushman WC. Diabetes and hypertension: the bad companions. *The Lancet* 2012;380(9841):601-10.
- 4 Sun D, Zhou T, Heianza Y, *et al.* Type 2 Diabetes and Hypertension. *Circ Res* 2019;124(6):930-37.
- 5 Rask-Madsen C, Li Q, Freund B, *et al.* Loss of insulin signaling in vascular endothelial cells accelerates atherosclerosis in apolipoprotein E null mice. *Cell metabolism* 2010;11(5):379-89.
- 6 Rask-Madsen C, Buonomo E, Li Q, *et al.* Hyperinsulinemia does not change atherosclerosis development in apolipoprotein E null mice. *Arteriosclerosis, thrombosis, and vascular biology* 2012;32(5):1124-31.
- 7 Sarwar N, Gao P, Seshasai SR, *et al.* Diabetes mellitus, fasting blood glucose concentration, and risk of vascular disease: a collaborative meta-analysis of 102 prospective studies. *Lancet (London, England)* 2010;375(9733):2215-22.
- 8 Huxley R, Barzi F, Woodward M. Excess risk of fatal coronary heart disease associated with diabetes in men and women: meta-analysis of 37 prospective cohort studies. *BMJ (Clinical research ed)* 2006;332(7533):73-8.
- 9 Schramm TK, Gislason GH, Køber L, *et al.* Diabetes patients requiring glucose-lowering therapy and nondiabetics with a prior myocardial infarction carry the same cardiovascular risk: a population study of 3.3 million people. *Circulation* 2008;117(15):1945-54.
- 10 Almdal T, Scharling H, Jensen JS, *et al.* The independent effect of type 2 diabetes mellitus on ischemic heart disease, stroke, and death: a population-based study of 13,000 men and women with 20 years of follow-up. *Archives of internal medicine*

---

2004;164(13):1422-6.

11 Fox CS. Cardiovascular disease risk factors, type 2 diabetes mellitus, and the Framingham Heart Study. *Trends in cardiovascular medicine* 2010;20(3):90-5.

12 Fox CS, Coady S, Sorlie PD, *et al.* Trends in cardiovascular complications of diabetes. *JAMA* 2004;292(20):2495-9.

13 Hypertension in Diabetes Study (HDS): I. Prevalence of hypertension in newly presenting type 2 diabetic patients and the association with risk factors for cardiovascular and diabetic complications. *J Hypertens* 1993;11(3):309-17.

14 Lewington S, Clarke R, Qizilbash N, *et al.* Age-specific relevance of usual blood pressure to vascular mortality: a meta-analysis of individual data for one million adults in 61 prospective studies. *Lancet (London, England)* 2002;360(9349):1903-13.

15 Britton KA, Gaziano JM, Djoussé L. Normal systolic blood pressure and risk of heart failure in US male physicians. *European journal of heart failure* 2009;11(12):1129-34.

16 Lawes CM, Rodgers A, Bennett DA, *et al.* Blood pressure and cardiovascular disease in the Asia Pacific region. *J Hypertens* 2003;21(4):707-16.

17 Brown DW, Giles WH, Greenlund KJ. Blood pressure parameters and risk of fatal stroke, NHANES II mortality study. *American journal of hypertension* 2007;20(3):338-41.

18 Aronow WS, Fleg JL, Pepine CJ, *et al.* ACCF/AHA 2011 expert consensus document on hypertension in the elderly: a report of the American College of Cardiology Foundation Task Force on Clinical Expert Consensus Documents developed in collaboration with the American Academy of Neurology, American Geriatrics Society, American Society for Preventive Cardiology, American Society of Hypertension, American Society of Nephrology, Association of Black Cardiologists, and European Society of Hypertension. *Journal of the American Society of Hypertension : JASH* 2011;5(4):259-352.

19 Ikeda A, Iso H, Yamagishi K, *et al.* Blood pressure and the risk of stroke, cardiovascular disease, and all-cause mortality among Japanese: the JPHC Study.

---

1  
2  
3  
4 *American journal of hypertension* 2009;22(3):273-80.

5  
6 20 Lotfaliany M, Akbarpour S, Mozafary A, *et al.* Hypertension phenotypes and  
7  
8 incident cardiovascular disease and mortality events in a decade follow-up of a Middle  
9  
10 East cohort. *J Hypertens* 2015;33(6):1153-61.

11  
12 21 Oh JY, Allison MA, Barrett-Connor E. Different impacts of hypertension and  
13  
14 diabetes mellitus on all-cause and cardiovascular mortality in community-dwelling  
15  
16 older adults: the Rancho Bernardo Study. *J Hypertens* 2017;35(1):55-62.

17  
18 22 Hu G, Jousilahti P, Tuomilehto J. Joint effects of history of hypertension at baseline  
19  
20 and type 2 diabetes at baseline and during follow-up on the risk of coronary heart  
21  
22 disease. *Eur Heart J* 2007;28(24):3059-66.

23  
24 23 Kokubo Y, Okamura T, Watanabe M, *et al.* The combined impact of blood pressure  
25  
26 category and glucose abnormality on the incidence of cardiovascular diseases in a  
27  
28 Japanese urban cohort: the Suita Study. *Hypertens Res* 2010;33(12):1238-43.

29  
30 24 Zafari N, Asgari S, Lotfaliany M, *et al.* Impact Of Hypertension versus Diabetes on  
31  
32 Cardiovascular and All-cause Mortality in Iranian Older Adults: Results of 14 Years of  
33  
34 Follow-up. *Sci Rep* 2017;7(1):14220.

35  
36 25 Wang C, Gao Y, Zhu L, *et al.* Treatment Patterns in Patients With Newly Diagnosed  
37  
38 Type 2 Diabetes in China: A Retrospective, Longitudinal Database Study. *Clinical*  
39  
40 *therapeutics* 2019;41(8):1440-52.

41  
42 26 Hu G, Sarti C, Jousilahti P, *et al.* The impact of history of hypertension and type 2  
43  
44 diabetes at baseline on the incidence of stroke and stroke mortality. *Stroke*  
45  
46 2005;36(12):2538-43.

47  
48 27 Chen G, McAlister FA, Walker RL, *et al.* Cardiovascular outcomes in framingham  
49  
50 participants with diabetes: the importance of blood pressure. *Hypertension*  
51  
52 2011;57(5):891-7.

53  
54 28 Patel A, MacMahon S, Chalmers J, *et al.* Effects of a fixed combination of  
55  
56 perindopril and indapamide on macrovascular and microvascular outcomes in patients  
57  
58 with type 2 diabetes mellitus (the ADVANCE trial): a randomised controlled trial.  
59  
60 *Lancet (London, England)* 2007;370(9590):829-40.

1  
2  
3  
4 29 Turnbull F, Neal B, Algert C, *et al.* Effects of different blood pressure-lowering  
5 regimens on major cardiovascular events in individuals with and without diabetes  
6 mellitus: results of prospectively designed overviews of randomized trials. *Archives of*  
7  
8 *internal medicine* 2005;165(12):1410-9.  
9

10  
11 30 Thompson AM, Hu T, Eshelbrenner CL, *et al.* Antihypertensive Treatment and  
12 Secondary Prevention of Cardiovascular Disease Events Among Persons Without  
13 Hypertension: A Meta-analysis. *JAMA* 2011;305(9):913-22.  
14  
15  
16  
17  
18  
19  
20  
21  
22  
23  
24  
25  
26  
27  
28  
29  
30  
31  
32  
33  
34  
35  
36  
37  
38  
39  
40  
41  
42  
43  
44  
45  
46  
47  
48  
49  
50  
51  
52  
53  
54  
55  
56  
57  
58  
59  
60

For peer review only

**Table 1 Baseline characteristics of the included patients.**

|                                                | <b>HTN-only</b> | <b>T2DM-only</b>   | <b>T2DM and HTN</b> | <b>Non-T2DM<br/>and non-HTN</b> | <b>P<br/>value</b> |
|------------------------------------------------|-----------------|--------------------|---------------------|---------------------------------|--------------------|
| <b>Total</b>                                   | 9,653           | 8,012              | 3,592               | 10561                           |                    |
| <b>Sex</b>                                     |                 |                    |                     |                                 |                    |
| Male                                           | 4,419 (45.8%)   | 4,006 (50.0%)      | 1,634 (45.5%)       | 4889 (46.3%)                    | -                  |
| Female                                         | 5,234 (54.2%)   | 4,006 (50.0%)      | 1,958 (54.5%)       | 5672 (53.7%)                    | -                  |
| <b>Age</b>                                     |                 |                    |                     |                                 |                    |
| 18-29 (n, %)                                   | 79 (0.8%)       | 204 (2.5%)         | 31 (0.9%)           | 1372 (13.0%)                    | -                  |
| 30-39 (n, %)                                   | 602 (6.2%)      | 831 (10.4%)        | 139 (3.9%)          | 2439 (23.1%)                    | -                  |
| 40-49 (n, %)                                   | 1,856 (19.2%)   | 2,323 (29.0%)      | 553 (15.4%)         | 3227 (30.6%)                    | -                  |
| 50-59 (n, %)                                   | 1,856 (20.7%)   | 2,297 (28.7%)      | 927 (25.8%)         | 1954 (18.5%)                    | -                  |
| 60-69 (n, %)                                   | 2,552 (26.4%)   | 1,704 (21.3%)      | 1,194 (33.2%)       | 1179 (11.2%)                    | -                  |
| 70-79 (n, %)                                   | 1,715 (17.8%)   | 556 (6.9%)         | 573 (16.0%)         | 336 (3.2%)                      | -                  |
| ≥80 (n, %)                                     | 852 (8.8%)      | 97 (1.2%)          | 175 (4.9%)          | 54 (0.5%)                       | -                  |
| <b>Triglyceride<br/>(mmol/L)</b>               | 1.86 (1.54)     | 2.35 (2.55)        | 2.29 (1.85)         | 1.71 (1.65)                     | <.0001             |
| <b>Total<br/>cholesterol<br/>(mmol/L)</b>      | 5.31 (1.19)     | 5.32 (1.41)        | 5.29 (1.28)         | 5.28 (1.15)                     | 0.3506             |
| <b>HDL-C<br/>(mmol/L)</b>                      | 1.41 (0.41)     | 1.25 (0.45)        | 1.26 (0.39)         | 1.40 (0.39)                     | <.0001             |
| <b>LDL-C<br/>(mmol/L)</b>                      | 3.17 (1.00)     | 3.07 (1.03)        | 3.02 (0.98)         | 3.03 (0.90)                     | <.0001             |
| <b>Serum<br/>creatinine<br/>(µmol/L)</b>       | 81.11 (39.35)   | 70.57 (23.94)      | 84.26 (59.38)       | 76.78 (20.42)                   | <.0001             |
| <b>HbA1c (%)</b>                               | 5.58 (1.38)     | 9.41 (3.11)        | 8.41 (2.63)         | 5.73 (1.31)                     | <.0001             |
| <b>Fasting blood-<br/>glucose<br/>(mmol/L)</b> | 5.76 (1.28)     | 11.15 (5.28)       | 9.88 (5.14)         | 5.58 (1.13)                     | <.0001             |
| <b>Serum insulin<br/>(pmol/liter)</b>          | 95.63 (60.05)   | 117.64<br>(288.36) | 78.43 (57.89)       | 9.98 (3.21)                     | 0.6502             |
| <b>Proteinuria<br/>(positive)</b>              | 310 (3.2%)      | 145 (1.8%)         | 126 (3.5%)          | 143 (1.4%)                      | <.0001             |
| <b>Diabetes<br/>complications</b>              |                 |                    |                     |                                 |                    |
| Diabetic<br>nephropathy                        | -               | 450 (5.6%)         | 446 (12.4%)         | -                               | -                  |
| Diabetic<br>retinopathy                        | -               | 313 (3.9%)         | 159 (4.4%)          | -                               | -                  |



|                                      |   |            |            |   |   |
|--------------------------------------|---|------------|------------|---|---|
| Diabetic neuropathy                  | - | 462 (5.8%) | 225 (6.3%) | - | - |
| Diabetic lower limb vascular disease | - | 7 (0.09%)  | 15 (0.42%) | - | - |
| Diabetic foot                        | - | 80 (1.0%)  | 61 (1.7%)  | - | - |

HTN: hypertension; T2DM: type 2 diabetes mellitus; HDL-C: high density lipoprotein cholesterol; LDL-C: low density lipoprotein cholesterol. For continuous variables, data were presented as mean (SD) and P values for four groups were calculated using ANOVA test. For categorical variables, data were presented as number (frequency) and P values for four groups were calculated using Chi-square test.

**Table 2 Association of type 2 diabetes mellitus (T2DM) and/or hypertension (HTN) with combined vascular events and stroke compared with the non-T2DM and non-HTN.**

|                              | Combined vascular event (VE) |         | Stroke               |         |
|------------------------------|------------------------------|---------|----------------------|---------|
|                              | HR (95% CI)                  | P value | HR (95% CI)          | P value |
| <b>Unadjusted</b>            |                              |         |                      |         |
| Non-T2DM and non-HTN         | 1 (reference)                |         | 1 (reference)        |         |
| T2DM-only                    | 1.747 (1.566, 1.949)         | <.0001  | 2.077 (1.755, 2.459) | <.0001  |
| HTN-only                     | 6.246 (5.712, 6.830)         | <.0001  | 8.642 (7.517, 9.934) | <.0001  |
| T2DM and HTN                 | 4.930 (4.93, 5.474)          | <.0001  | 5.990 (5.102, 7.032) | <.0001  |
| <b>Age- and sex-adjusted</b> |                              |         |                      |         |
| Non-T2DM and non-HTN         | 1 (reference)                |         | 1 (reference)        |         |
| T2DM-only                    | 1.258 (1.127, 1.405)         | <.0001  | 1.464 (1.235, 1.735) | <.0001  |
| HTN-only                     | 3.344 (3.046, 3.670)         | <.0001  | 4.409 (3.817, 5.093) | <.0001  |
| T2DM and HTN                 | 2.595 (2.329, 2.892)         | <.0001  | 3.021 (2.561, 3.563) | <.0001  |
| <b>Risk factors-adjusted</b> |                              |         |                      |         |
| Non-T2DM and non-HTN         | 1 (reference)                |         | 1 (reference)        |         |
| T2DM-only                    | 1.332 (1.134, 1.565)         | 0.0005  | 1.584 (1.246, 2.014) | <.0001  |
| HTN-only                     | 3.244 (2.946, 3.572)         | <.0001  | 4.543 (3.918, 5.268) | <.0001  |
| T2DM and HTN                 | 3.002 (2.577, 3.497)         | <.0001  | 4.151 (3.346, 5.149) | <.0001  |

CI, confidence interval; VE, combined vascular event; T2DM, type 2 diabetes mellitus;

HR, hazard ratio; HTN, hypertension. Risk factors include age, sex, triglycerides, total cholesterol, high density lipoprotein cholesterol, low density lipoprotein cholesterol.

**Table 3 Association of type 2 diabetes mellitus (T2DM) and hypertension (HTN) with combined vascular events and stroke compared with HTN-only.**

|                              | Combined vascular event (VE) |         | Stroke               |         |
|------------------------------|------------------------------|---------|----------------------|---------|
|                              | HR (95% CI)                  | P value | HR (95% CI)          | P value |
| <b>Unadjusted</b>            |                              |         |                      |         |
| HTN-only                     | 1 (reference)                |         | 1 (reference)        |         |
| T2DM and HTN                 | 0.789 (0.732, 0.851)         | <.0001  | 0.693 (0.624, 0.769) | <.0001  |
| <b>Age- and sex-adjusted</b> |                              |         |                      |         |
| HTN-only                     | 1 (reference)                |         | 1 (reference)        |         |
| T2DM and HTN                 | 0.776 (0.720, 0.836)         | <.0001  | 0.685 (0.617, 0.761) | <.0001  |
| <b>Risk factors-adjusted</b> |                              |         |                      |         |
| HTN-only                     | 1 (reference)                |         | 1 (reference)        |         |
| T2DM and HTN                 | 0.925 (0.814, 1.052)         | 0.2352  | 0.914 (0.771, 1.082) | 0.2959  |

CI, confidence interval; VE, combined vascular event; T2DM, type 2 diabetes mellitus;

HR, hazard ratio; HTN, hypertension. Risk factors include age, sex, triglycerides, total cholesterol, high density lipoprotein cholesterol, low density lipoprotein cholesterol.

**Table 4 Association of type 2 diabetes mellitus (T2DM) and/or hypertension (HTN) with combined vascular events and stroke compared with T2DM-only.**

|                              | Combined vascular event (VE) |         | Stroke               |         |
|------------------------------|------------------------------|---------|----------------------|---------|
|                              | HR (95% CI)                  | P value | HR (95% CI)          | P value |
| <b>Unadjusted</b>            |                              |         |                      |         |
| T2DM-only                    | 1 (reference)                |         | 1 (reference)        |         |
| HTN-only                     | 3.575 (3.296, 3.877)         | <.0001  | 4.160 (3.701, 4.675) | <.0001  |
| T2DM and HTN                 | 2.821 (2.558, 3.112)         | <.0001  | 2.883 (2.504, 3.321) | <.0001  |
| <b>Age- and sex-adjusted</b> |                              |         |                      |         |
| T2DM-only                    | 1 (reference)                |         | 1 (reference)        |         |
| HTN-only                     | 2.657 (2.447, 2.885)         | <.0001  | 3.011 (2.676, 3.389) | <.0001  |
| T2DM and HTN                 | 2.062 (1.868, 2.276)         | <.0001  | 2.063 (1.789, 2.379) | <.0001  |
| <b>Risk factors-adjusted</b> |                              |         |                      |         |
| T2DM-only                    | 1 (reference)                |         | 1 (reference)        |         |
| HTN-only                     | 2.435 (2.113, 2.805)         | <.0001  | 2.868 (2.341, 3.513) | <.0001  |
| T2DM and HTN                 | 2.253 (1.876, 2.706)         | <.0001  | 2.620 (2.031, 3.380) | <.0001  |

CI, confidence interval; VE, combined vascular event; T2DM, type 2 diabetes mellitus;

HR, hazard ratio; HTN, hypertension. Risk factors include age, sex, triglycerides, total cholesterol, high density lipoprotein cholesterol, low density lipoprotein cholesterol.

---

**Figure legends**

Figure 1 Kaplan–Meier survival curve of combined vascular events (A) and stroke (B) among different groups. HTN: hypertension, T2DM: type 2 diabetes mellitus.

For peer review only

A

1  
2  
3  
4  
5  
6  
7  
8  
9  
10  
11  
12  
13  
14  
15  
16  
17  
18  
19  
20  
21  
22  
23  
24  
25  
26  
27  
28  
29  
30  
31  
32  
33  
34  
35  
36  
37  
38  
39  
40  
41  
42  
43  
44  
45  
46  
47  
48  
49  
50  
51  
52  
53  
54  
55  
56  
57  
58  
59  
60



Number at risk

| Diseases type        | 0     | 1    | 2    | 3    | 4    | 5    |
|----------------------|-------|------|------|------|------|------|
| HTN only             | 9653  | 7303 | 6381 | 5463 | 4416 | 3215 |
| T2DM only            | 8012  | 7010 | 5871 | 4742 | 3512 | 2202 |
| HTN and T2DM         | 3592  | 2934 | 2472 | 2082 | 1645 | 1086 |
| Non-HTN and non-T2DM | 10561 | 9233 | 7876 | 6918 | 5808 | 4086 |

B

Free from stroke



Number at risk

| Diseases type        | 0     | 1    | 2    | 3    | 4    | 5    |
|----------------------|-------|------|------|------|------|------|
| HTN only             | 9653  | 7809 | 7004 | 6150 | 5062 | 3760 |
| T2DM only            | 8012  | 7093 | 6023 | 4945 | 3702 | 2339 |
| HTN and T2DM         | 3592  | 3156 | 2719 | 2333 | 1876 | 1238 |
| Non-HTN and non-T2DM | 10561 | 9314 | 8001 | 7084 | 5998 | 4266 |

STROBE Statement—Checklist of items that should be included in reports of *cross-sectional studies*

|                              | Item No | Recommendation                                                                                                                                                                                               | Page No |
|------------------------------|---------|--------------------------------------------------------------------------------------------------------------------------------------------------------------------------------------------------------------|---------|
| <b>Title and abstract</b>    | 1       | (a) Indicate the study's design with a commonly used term in the title or the abstract                                                                                                                       | 1, 2    |
|                              |         | (b) Provide in the abstract an informative and balanced summary of what was done and what was found                                                                                                          | 2       |
| <b>Introduction</b>          |         |                                                                                                                                                                                                              |         |
| Background/rationale         | 2       | Explain the scientific background and rationale for the investigation being reported                                                                                                                         | 4, 5    |
| Objectives                   | 3       | State specific objectives, including any prespecified hypotheses                                                                                                                                             | 5       |
| <b>Methods</b>               |         |                                                                                                                                                                                                              |         |
| Study design                 | 4       | Present key elements of study design early in the paper                                                                                                                                                      | 5       |
| Setting                      | 5       | Describe the setting, locations, and relevant dates, including periods of recruitment, exposure, follow-up, and data collection                                                                              | 5, 6    |
| Participants                 | 6       | (a) Give the eligibility criteria, and the sources and methods of selection of participants                                                                                                                  | 5, 6    |
| Variables                    | 7       | Clearly define all outcomes, exposures, predictors, potential confounders, and effect modifiers. Give diagnostic criteria, if applicable                                                                     | 6       |
| Data sources/<br>measurement | 8*      | For each variable of interest, give sources of data and details of methods of assessment (measurement). Describe comparability of assessment methods if there is more than one group                         | 5, 6    |
| Bias                         | 9       | Describe any efforts to address potential sources of bias                                                                                                                                                    | 5, 6    |
| Study size                   | 10      | Explain how the study size was arrived at                                                                                                                                                                    | 7       |
| Quantitative variables       | 11      | Explain how quantitative variables were handled in the analyses. If applicable, describe which groupings were chosen and why                                                                                 | 5, 6    |
| Statistical methods          | 12      | (a) Describe all statistical methods, including those used to control for confounding                                                                                                                        | 6, 7    |
|                              |         | (b) Describe any methods used to examine subgroups and interactions                                                                                                                                          | NA      |
|                              |         | (c) Explain how missing data were addressed                                                                                                                                                                  | NA      |
|                              |         | (d) If applicable, describe analytical methods taking account of sampling strategy                                                                                                                           | NA      |
|                              |         | (e) Describe any sensitivity analyses                                                                                                                                                                        | NA      |
| <b>Results</b>               |         |                                                                                                                                                                                                              |         |
| Participants                 | 13*     | (a) Report numbers of individuals at each stage of study—eg numbers potentially eligible, examined for eligibility, confirmed eligible, included in the study, completing follow-up, and analysed            | 7       |
|                              |         | (b) Give reasons for non-participation at each stage                                                                                                                                                         | NA      |
|                              |         | (c) Consider use of a flow diagram                                                                                                                                                                           | NA      |
| Descriptive data             | 14*     | (a) Give characteristics of study participants (eg demographic, clinical, social) and information on exposures and potential confounders                                                                     | 7, 8    |
|                              |         | (b) Indicate number of participants with missing data for each variable of interest                                                                                                                          | 7, 8    |
| Outcome data                 | 15*     | Report numbers of outcome events or summary measures                                                                                                                                                         | 7, 8    |
| Main results                 | 16      | (a) Give unadjusted estimates and, if applicable, confounder-adjusted estimates and their precision (eg, 95% confidence interval). Make clear which confounders were adjusted for and why they were included | 7, 8    |

|                          |    |                                                                                                                                                                            |       |
|--------------------------|----|----------------------------------------------------------------------------------------------------------------------------------------------------------------------------|-------|
|                          |    | (b) Report category boundaries when continuous variables were categorized                                                                                                  | 7, 8  |
|                          |    | (c) If relevant, consider translating estimates of relative risk into absolute risk for a meaningful time period                                                           | NA    |
| Other analyses           | 17 | Report other analyses done—eg analyses of subgroups and interactions, and sensitivity analyses                                                                             | NA    |
| <b>Discussion</b>        |    |                                                                                                                                                                            |       |
| Key results              | 18 | Summarise key results with reference to study objectives                                                                                                                   | 9, 10 |
| Limitations              | 19 | Discuss limitations of the study, taking into account sources of potential bias or imprecision. Discuss both direction and magnitude of any potential bias                 | 10    |
| Interpretation           | 20 | Give a cautious overall interpretation of results considering objectives, limitations, multiplicity of analyses, results from similar studies, and other relevant evidence | 9, 10 |
| Generalisability         | 21 | Discuss the generalisability (external validity) of the study results                                                                                                      | 9, 10 |
| <b>Other information</b> |    |                                                                                                                                                                            |       |
| Funding                  | 22 | Give the source of funding and the role of the funders for the present study and, if applicable, for the original study on which the present article is based              | 11    |

\*Give information separately for exposed and unexposed groups.

**Note:** An Explanation and Elaboration article discusses each checklist item and gives methodological background and published examples of transparent reporting. The STROBE checklist is best used in conjunction with this article (freely available on the Web sites of PLoS Medicine at <http://www.plosmedicine.org/>, Annals of Internal Medicine at <http://www.annals.org/>, and Epidemiology at <http://www.epidem.com/>). Information on the STROBE Initiative is available at [www.strobe-statement.org](http://www.strobe-statement.org).
